1 **Ecological causes of uneven diversification and richness in the mammal tree of life**

2 Short title: Ecological causes of diversification in mammals

3

4 **Nathan S. Upham<sup>1\*</sup>, Jacob A. Esselstyn<sup>2</sup>, and Walter Jetz<sup>1\*</sup>**

5

6 Author affiliations: <sup>1</sup>Department of Ecology & Evolutionary Biology, Yale University, New

7 Haven, CT 06511 USA. <sup>2</sup>Department of Biological Sciences and Museum of Natural Science,

8 Louisiana State University, Baton Rouge, LA 70803 USA.

9

10 \*Corresponding authors: 165 Prospect St., OML 122, New Haven, CT 06511 USA;

11 [nathan.upham@yale.edu](mailto:nathan.upham@yale.edu); [walter.jetz@yale.edu](mailto:walter.jetz@yale.edu)

12

## 13 **Abstract**

14           The uneven distribution of species in the tree of life is rooted in unequal speciation and  
15 extinction among groups. Yet the causes of differential diversification are little known despite  
16 their relevance for sustaining biodiversity into the future. Here we investigate rates of species  
17 diversification across extant Mammalia, a compelling system that includes our own closest  
18 relatives. We develop a new phylogeny of nearly all ~6000 species using a 31-gene supermatrix  
19 and fossil node- and tip-dating approaches to establish a robust evolutionary timescale for  
20 mammals. Our findings link the causes of uneven modern species richness with ecologically-  
21 driven variation in rates of speciation and/or extinction, including 24 detected shifts in net  
22 diversification. Speciation rates are a stronger predictor of among-clade richness than clade age,  
23 countering claims of clock-like speciation in large phylogenies. Surprisingly, speciation rate  
24 heterogeneity in recent radiations shows limited association with latitude, despite the well-known  
25 increase in species richness toward the equator. Instead, we find a deeper-time association where  
26 clades of high-latitude species have the highest speciation rates, suggesting that species durations  
27 are shorter (turnover is higher) outside than inside the tropics. At shallower timescales (i.e.,  
28 young clades), diurnality and low vagility are both linked to greater speciation rates and extant  
29 richness. We suggest that high turnover among small-ranged allopatric species has erased the  
30 signal of vagility in older clades, while diurnality has adaptively promoted lineage persistence.

31 These findings highlight the underappreciated joint roles of ephemeral (turnover-based) and  
32 adaptive (persistence-based) processes of diversification, which manifest in recent and more  
33 ancient evolutionary radiations of mammals to explain modern diversity.

## 34 **Keywords**

35 Phylogenetics, macroevolution, dispersal, mass extinction

## 36 **Author Summary**

37           The over 6000 living species in the mammalian tree of life are distributed unevenly  
38 among branches so that similarly aged groups sometimes differ many fold in species richness  
39 (e.g., ~2500 rodent species versus 8 pangolins). Why differential bursts of species diversification  
40 occur, and how long they persist, has implications for sustaining biodiversity. Here we develop a  
41 robust evolutionary timescale for most extant species, recovering signatures of rate-variable  
42 diversification linked to ecological factors. Mammals with low dispersal or that are day-active  
43 show the fastest recent speciation rates, consistent with mechanisms of allopatric isolation and  
44 ecological opportunity, respectively. Speciation is surprisingly faster in extra-tropical than  
45 tropical lineages, suggesting that longer species durations for tropical lineages underpin the  
46 latitudinal diversity gradient in mammals.

47

## 48 **Introduction**

49           Branches in the mammal tree of life range from mega-diverse rodents and bats to  
50 similarly old, yet species-poor, groups like treeshrews and pangolins (stem ages all ~60-70  
51 million years ago [Ma]). Questioning why some evolutionary groups are more speciose than  
52 others traces to the classic ‘hollow curve’ observation of Willis [1], which was formalized for  
53 phylogenetic tree shape as unevenness (or imbalance) [2]. Uneven species richness implies  
54 uneven net diversification (speciation – extinction), but whether speciose clades usually derive  
55 from faster rates or older ages is controversial [2–4]. Similarly debated are the causal roles of  
56 environmental factors [3,5–7] or intrinsic traits of species [8,9] as determinants of rate-variable  
57 diversification. Recently, analytical advances in identifying macroevolutionary rate regimes [10]  
58 and species-level rate variation at the instantaneous present (e.g., the tip DR metric [11,12]) have  
59 uncovered gradients of higher speciation rates with latitude [13–15] and elevation [7]. Ephemeral  
60 speciation processes [16] appear to underlie these dynamics, where unstable environments  
61 produce many short-lived species via high rates of lineage turnover (speciation + extinction). In  
62 contrast, adaptive processes that involve accessing novel ecospace are expected to decrease  
63 extinction rates [6,17,18], so that species accumulate via persistence not turnover. If nascent  
64 allopatric species form regularly [19], then identifying which factors cause them to persist or go  
65 extinct (e.g., climate seasonality, dispersal ability, niche adaptations; [7,13,14,16,19–21]) is  
66 central to understanding why evolutionary tree shapes and geographic diversity are uneven. The  
67 challenge to reconstructing species birth and death across Mammalia is that a robust evolutionary  
68 timescale is required for any test of rate variation to be meaningful.

69           Until now, the species-level phylogenies of mammals have been inadequate for the task  
70 of understanding macroevolutionary tree shape. Parsimony supertrees [22] were first

71 implemented on large scales across Mammalia (Bininda-Emonds et al. [23] and its updates  
72 [24,25]). However, supertree methods inherently result in node conflict when merged source  
73 trees disagree (e.g., >50% of nodes [23,24]) that, when secondarily resolved [25], add branch  
74 length artifacts to regions of the tree with the greatest phylogenetic uncertainty. Supertrees are  
75 thus poorly suited for studying rates of lineage diversification (*SI Appendix*, Fig. S14 for a  
76 comparison of tree shapes). However, they continue to be a popular choice for large-scale tests  
77 of diversification-rate hypotheses [e.g., 26–29]. Herein, we abandon the supertree paradigm,  
78 using instead a single DNA supermatrix to improve upon the Bayesian backbone-and-patch  
79 approach developed in birds [11], squamates [30], and amphibians [31].

80       Our goals are to: (i) build sets of species-level mammal phylogenies that are optimized  
81 for root-to-tip comparisons of lineage diversification and trait evolutionary rates; (ii) test for tree-  
82 wide and among-clade variation in rates through time; and (iii) evaluate the ecological causes of  
83 those rate-variable processes, which we find are the primary predictors of species richness  
84 among mammal clades. Due to the rapid innovations in phylogenetic comparative methods and  
85 frequent controversies over their implementation [e.g., 32–37], we employ multiple modeling  
86 strategies at each analysis stage to corroborate our results. Testing for ecological effects on  
87 recent versus older radiations reveals complex and age-dependent connections between clade  
88 traits, speciation rates, and species richness. We paradoxically find that extant lineages outside  
89 the tropics have faster rates of recent speciation than do tropical lineages where modern species  
90 richness is the greatest. This type of mismatch suggests that high lineage turnover characterizes  
91 larger swaths of the mammal tree of life than previously appreciated—complementing  
92 traditionally invoked mechanisms of ‘key innovations’ [38] and disparate ecological opportunity  
93 [6,17,18] to explain uneven species richness patterns.

## 94 **Results and Discussion**

95           Our mammal tree (Fig. 1) includes 5,804 extant and 107 recently extinct species in a  
96 credible set of 10,000 trees, integrates age and topological uncertainty, and incorporates 1,813  
97 DNA-lacking species using probabilistic constraints. It thereby offers a species-level phylogeny  
98 with all branches estimated under a unified birth-death framework (available at [vertlife.org](http://vertlife.org)).  
99 Trees are built using: (i) an updated taxonomy; (ii) a newly assembled 31-gene supermatrix; and  
100 (iii) the backbone-and-patch approach, which here estimates the phylogenies of 28 mammal  
101 subclades (identified in a global DNA tree) with relative branch lengths, re-scales the branches to  
102 corresponding divergence times in fossil-calibrated backbones, and grafts each subclade to the  
103 backbone (Fig. 2; *Methods, SI Appendix, Datasets S1-S6*). We developed four credible sets of  
104 Mammalia-wide trees based on node- or tip-dated backbones [39,40] and the inclusion or  
105 exclusion of DNA-lacking species. Analyzing samples of trees from each set yields some  
106 variation in node ages, but consistent results across all sensitivity analyses (*SI Appendix, Fig. S9-*  
107 *11, S21-S22*). We recommend that researchers use the ‘completed’ or ‘DNA-only’ tree sets for  
108 addressing questions where diversification rates or trait evolution are paramount, respectively;  
109 when that distinction overlaps (e.g., trait-dependent diversification) we recommend comparing  
110 analyses run on tree samples from both sets.

111           **Tree-wide and among-clade tempo of lineage diversification.** The absolute and  
112 relative timings of mammal diversification are debated [23,41], with particular controversies  
113 around whether early placentals diverged before, after, or during the Cretaceous-Paleogene (K-  
114 Pg) mass extinction event, 66 Ma (short fuse, long fuse, or explosive models, respectively [42]).  
115 We estimate the age of crown Placentalia at 92 Ma (95% confidence interval [CI] of 77, 105  
116 using node-dating; tip-dating yielded mostly similar results, *SI Appendix, Fig. S9*). The first four

117 placental divergences unambiguously preceded the K-Pg (Fig. 3a; filled circles), followed by the  
118 next 21 divergences with CIs that overlap the K-Pg (Fig. 3a–b). We find a Cretaceous “fuse” of  
119 ~25-Ma between the radiation of crown Placentalia and nine of 18 crown orders (*SI Appendix*,  
120 Table S6), in line with some estimates [41,43], but longer than others (e.g., [23]). The burst of  
121 tree-wide lineage turnover we recover near the K-Pg (visual anomalies in speciation and  
122 extinction rates; Fig. 3c) is remarkable for matching concurrent fossil evidence for pulses of  
123 origination and extinction [42,44,45] (Fig. 3d). Despite spatiotemporal biases in fossil  
124 preservation [46,47] and extant phylogeny reconstruction [48], corroboration between these  
125 genetic and fossil data suggests they reflect genuine dynamics in mammalian evolution [49].

126 We recover at least 24 lineage-specific shifts in the net diversification rates of mammals  
127 (Fig. 1, 3c, e; shifts present in  $\geq 50\%$  of maximum shift credibility trees analyzed in BAMM  
128 [50]; see *SI Appendix*, Table S8). The earliest rate shift occurs in either crown Placentalia (1.1x  
129 higher than the Mammalia-wide median rate of 0.138 species/lineage/Ma) or Boreoeutheria  
130 (1.6x, node C in Fig. 1). These shifts involve 18 different lineages and are all positive, except a  
131 rate decrease uncovered for the primate clade of lemurs, lorises, and galagos (Strepsirrhini; node  
132 O). The two largest rate increases (4.0x and 3.2x) occurred in the last 10 Ma: the gopher-like  
133 tuco-tucos of South America (*Ctenomys*, node Q), and the Indo-Pacific flying foxes (*Pteropus*,  
134 node J). Overall, rate increases near the present tend to be particularly high, with a 2.2x mean in  
135 the Miocene versus 1.3x in each the Oligocene and Eocene (Fig. 3c;  $df=2$ ,  $F=7.772$ ,  $P=0.003$ ),  
136 which corroborates the expectation for extinctions deeper in the tree (e.g., [44]) to have reduced  
137 our ability to detect more ancient shifts [48,50]. Different to the explosive model [42], no  
138 lineage-specific rate shifts implicate the K-Pg in promoting radiations, either preceding the event  
139 (Placentalia) or occurring later (Fig. 3c, e). Notably, we record the highest probability of tree-

140 wide rate increases ~15 Ma (*SI Appendix*, Fig. S15c and d), in contrast to previous results for rate  
141 decreases ~8 and ~3 Ma in mammals [23,26].

142 **Within-clade tempo of lineage diversification.** The timings of radiation we recover  
143 emphasize that the majority of mammalian diversification in extant lineages occurred during the  
144 last ~50 Ma (Fig. 1, 3). Environmental changes during this period are posited to have broadly  
145 changed the biosphere [3,51], with potential imprints on phylogenies as temporal variation in  
146 diversification rates [4–6,49]. We predicted that species-rich clades would display stronger  
147 signatures than depauperate clades of rate-variable (RV) diversification if RV processes were  
148 predominant, since the likelihood of rare events (within-clade shifts in speciation or extinction)  
149 and our statistical power to detect them should increase with clade size. Rate increases are also  
150 expected to yield more extant species. We find that models of RV diversification [49] were  
151 favored over rate-constant (RC) models [48] for five out of 12 placental subclades tested (Fig. 3f;  
152 *SI Appendix*, Table S9). The strongest RV signal is in the speciose mouse-related clade of  
153 rodents, along with shrews, catarrhine primates, and the cow- and whale-related clades of  
154 artiodactyls (Fig. 3e), the latter of which was previously suggested [49,50]. However, since we  
155 also found lineage-specific rate shifts in those groups (clades 46, 31, 42, 37, and 36; Fig. 1, 3e–  
156 f), it was not possible to distinguish between within-lineage scenarios of multiple rate regimes or  
157 time-variable rates using these modeling approaches.

158 As an additional, more sensitive, test of within-clade rate variation, we use clade-wide  
159 distributions of tip-level speciation rates as assessed using the tip DR metric [11] (Fig. 3f). We  
160 find the overall-highest tip speciation rates in simian primates (clades 42–43), including the  
161 human genus *Homo* (80<sup>th</sup> percentile, median 0.321 species/lineage/Ma; *H. sapiens* and three  
162 extinct species) and Indomalayan lutung monkeys (95<sup>th</sup> percentile, 0.419, *Trachypithecus*), while



163 the distinctive aardvark and platypus have the lowest tip speciation rates (clades 1, 14; Fig. 1).  
164 Broadly, we recognize substantial heterogeneity in tip rates across the mammal tree, sometimes  
165 with a few high-tip-rate species nested together with low-tip-rate species (Fig. 1), resulting in  
166 long right-side tails in the tip rate distributions (positive skew, e.g., clades 38 and 44 in Fig. 1,  
167 3f). We find that tip rate skew measures aspects of within-clade speciation rate variation that is  
168 otherwise uncaptured by model-fitting approaches (*SI Appendix*, Table S10).

169 **Time and ecology relative to clade species richness.** The relative importance of clade  
170 ages (time) versus rates of speciation and extinction (whether stochastic or ecologically driven)  
171 as an explanation of extant diversity levels is a matter of intense debate in mammals [5,6,52,8]  
172 and other taxa [19,53,27,54]. Past efforts to separate these hypotheses have focused on named  
173 clades (e.g., [4]), which are biased by subjective delineation and often vast age differences  
174 (mammal families range 3.8–59.0 Ma in mean crown ages; *SI Appendix*, Dataset S7). To avoid  
175 this bias, we sliced phylogenies at five-million-year intervals and took the tipward clades as  
176 objective units for analysis (Fig. 4a; *SI Appendix*, Fig. S5). Time-sliced clades thus account for  
177 the ‘pull of the present’ in modern trees [55] by analyzing successive levels of rootward  
178 covariance among clade crown age, species richness, tip speciation rate mean and skew, and  
179 mean ecological traits. If time-constant rates predominate [27,53,56], crown ages will explain  
180 most of the among-clade variation in species richness. In contrast, if rate variation is strong, as  
181 we already recognized for some nodes and named clades (Fig. 3) and expect from varying  
182 ecological regimes [2,5,6,19], diversification rates will have the greater explanatory power.

183 We find that clade age and richness are positively correlated—yet significantly less so  
184 than the unique effects of tip speciation rate mean and skew on richness (Fig. 4, multivariate  
185 PGLS; *SI Appendix*, Fig. S18 for univariate and taxon-based results). Critically, clade tip rate

186 mean has stronger effects on richness than expected from simulated RC trees containing only  
187 stochastic rate variation (Fig. 4c). Clade tip rate skew is also significant, especially so at deeper  
188 time slices (Fig. 4d), confirming that single speed-ups in diversification within a clade (e.g., due  
189 to a rate shift in one lineage) can drive much of its overall species richness today. These analyses  
190 support arguments that ‘ecology’ (broadly defined to include anything that alters rate processes)  
191 is a greater macroevolutionary force than time [54]; however, both clearly contribute to observed  
192 richness (adjusted- $R^2$ : 0.88 full model versus 0.26 with crown age only, means of 100-tree PGLS  
193 among 35-Ma clades). Jointly analyzing richness determinants in time-sliced clades offers an  
194 objective way to assess age and rate effects that, in turn, enables tests for which ecological  
195 factors are driving rate variation.

196 **Linking ecology to uneven diversification and richness.** Vagility, latitude, and  
197 diurnality are among the key purported causes of variation in mammalian species richness  
198 [3,5,6,57]. Species vagility, through its effect on gene-flow patterns [19,58], has been posited as  
199 inversely related to the probability and scale of geographic isolation, and hence allopatric  
200 speciation [21,59]. However, to our knowledge, vagility has never been assessed for its effects  
201 on mammalian speciation rates (see *SI Appendix*, Fig. S7 for an explanation of our allometric  
202 index of vagility). We performed phylogenetic path analysis [60] to assess the indirect effects of  
203 these ecological factors on mammalian richness via their impact on the joint, yet unequal,  
204 contributions of rates and ages to extant species numbers (Fig. 5, *Methods*, *SI Appendix*, Fig. S8).  
205 Here, the time-sliced clades allow us to distinguish trait-rate dynamics that are localized near the  
206 species level (if traits drive ephemeral speciation [16] or if they evolved very recently) from  
207 those that occur deeper in the tree and persist (if traits evolved anciently and did not affect  
208 extinction rates). We find that at the species level, and especially in herbivores and carnivores,

209 low-vagility mammals have higher tip speciation rates (Fig. 5a; ecological trait ~ rate PGLS [8]).  
210 Effects of vagility on clade tip rate mean are weakened toward deeper time slices, where they are  
211 instead recorded on tip rate skew (Fig. 5b). We interpret these short-lived effects of vagility on  
212 speciation rates as consistent with expectations that nascent allospecies are produced at a high  
213 rate, but are ephemeral, going extinct before their peripheral isolate can expand [16,19,59].  
214 While the nearly 20% of mammal species that are endemic to islands complicates our allometric  
215 vagility index, we note that the ~10-million-year ‘threshold’ whereby low-vagility lineages find  
216 an adaptive zone, evolve greater vagility, or vanish is robust to multiple sensitivity tests (*SI*  
217 *Appendix*, Fig. S21-S22). The influence of vagility on mammal diversification, however, might  
218 be non-linear as it is in birds (e.g., humped [19] or sigmoidal [21]).

219 Latitude, through strong covariation with environmental conditions and species richness,  
220 is considered to represent key mechanisms behind cross-taxon disparities in richness [3,13]. But  
221 recent evidence casts doubt on this presumed negative association between latitude and  
222 diversification rates [11,13,14]. Here we find that there is no effect of absolute latitude on tip-  
223 level rates of speciation (Fig. 5a). Instead, strong positive associations with latitude arise at  
224 deeper time slices, but without corresponding effects on clade tip rate skew (Fig. 5b). Similarly  
225 weak latitude-to-rate effects in young clades and species of birds [11,13,14] appear to emphasize  
226 the impact on species turnover cycles of temperate climatic instability, seasonality, and  
227 expansion of new habitats. We suggest that the traditionally invoked tropical ‘cradle’ (higher  
228 speciation) and ‘museum’ (lower extinction [3]) should re-focus upon the *combined turnover* of  
229 those processes, testing whether extratropical species are ‘cycled’ faster than tropical species  
230 and, if so, relative to which biogeographic processes. Extratropical lineages may not cycle fully,  
231 but instead persist through climatic oscillations in glacial refugia [61]. The Eocene-Oligocene

232 transition (~34 Ma) from tropical to temperate habitats [3] would then have initiated converse  
233 latitudinal gradients in species turnover rates and total richness, although North American  
234 mammal fossils suggests a steeper richness gradient beginning ~15 Ma [62].

235 Diurnality is a core behavioral-physiological trait tied to temporal niche innovation [57]  
236 and the associated potential for adaptive diversification. We find that repeated origins of daytime  
237 activity since the late Eocene (~35 Ma [57,63]) are associated with faster speciation, both at the  
238 present (Fig. 5a) and among 10-Ma time-sliced clades (Fig. 4b). Lineage-specific rate regimes  
239 also reflect signatures of greater diurnal activity on speciation rates (*SI Appendix*, Fig. S17a).  
240 These results affirm the importance of diurnality [63] in the context of other drivers of rate  
241 variation (vagility and latitude), placing previous findings of rapid diversification in diurnal  
242 lineages of primates [64] in a broader context. Results for 30- and 50-Ma clades appear to be  
243 confounded with nocturnal ancestors, including inverse effects on tip rate skew (Fig. 5b), which  
244 is consistent with diurnality evolving well after a “nocturnal bottleneck” among K-Pg-surviving  
245 mammals [57]. In contrast to vagility and latitude, we posit that greater daytime activity is an  
246 example where adaptive divergence in niche traits has decreased extinction rates via competitive  
247 release [17], and therefore led to greater persistence and species richness in diurnal lineages.

248 **Conclusions.** Our novel, time-calibrated phylogeny addressing all extant and described  
249 species of mammals puts a focus on ecological drivers of speciation and diversification. Rate-  
250 shifted clades have disparate ecological characteristics (*SI Appendix*, Fig. S17e), suggesting that  
251 lineage-specific events have fostered mammalian radiations. Nevertheless, we detect cross-clade  
252 signatures of intrinsic (vagility, activity pattern) and extrinsic (latitude) factors driving aspects of  
253 diversification at nested phylogenetic levels. We hypothesize that two main processes are at  
254 work. First, turnover-mediated diversification is acting on short timescales due to geographic

255 isolation among low-vagility species, and on longer timescales due to the dynamics of  
256 extratropical climates. Second, persistence-mediated diversification is demonstrated for diurnal  
257 lineages and related more generally to adaptations (or stable habitats) that result in lower  
258 extinction rates. Traversing between these modes of diversification may be possible if otherwise  
259 ephemeral allospecies can enter novel regions of the phenotype-to-environment landscape, either  
260 via niche evolution or extrinsic opportunity [6,16,17,59], to then continue diversifying with  
261 lower extinction risk. Overall, we show that ecological factors are influencing speciation rates,  
262 but the effects manifest at different hierarchical levels of the tree. Geologically recent processes  
263 associated with turnover or adaptation are not yet studied for most of life, but our results in  
264 mammals suggest that lineage-level gradients in these novelty-originating processes have causes  
265 rooted in the dynamics of population-level gene flow.

## 266 **Methods**

### 267 ***Building new species-level trees for extant Mammalia***

268 **Overview.** We reconstructed the evolutionary history of extant Mammalia aiming to  
269 maximize the accuracy and comparability of temporal information (branch lengths) across  
270 lineages in a credible set of time-calibrated phylogenies. Trees were built using a multi-step  
271 strategy (Fig. 2) designed to: (i) sample and vet available DNA sequences for extant and recently  
272 extinct species into a 31-gene supermatrix; (ii) use an updated taxonomy accounting for 367 new  
273 species and 76 genus transfers (5,911 total species; *SI Appendix*, Table S2 and Dataset S2); (iii)  
274 estimate a global maximum likelihood (ML) tree for 4,098 species in the DNA supermatrix to  
275 inform taxonomic constraints (*SI Appendix*, Dataset S3); (iv) include species unsampled for  
276 DNA within the Bayesian phylogenetic analyses (PASTIS completion [65]); and (v) integrate  
277 fossil data at nodes and tips to compare methods of calibrating backbone divergence times in  
278 mammals. We modified the backbone-and-patch analysis framework [11] to estimate the  
279 relative-time phylogenies of 28 non-overlapping subclades of mammals, called “patches”  
280 (identified in the global ML tree; Table S5 and Dataset S3). We then re-scaled branches to  
281 corresponding divergence times in fossil-calibrated backbones, and grafted the subclade patches  
282 to backbones to form Mammalia-wide trees (*SI Appendix*, Fig. S1-S3). We compared trees built  
283 using node-dated backbones (17 fossil calibrations [39]) and tip-dated backbones (matrix of  
284 modern and Mesozoic mammals [40]), which yielded broadly similar ages (*SI Appendix*, Fig. S9-  
285 S11). Strict topology constraints from the global ML tree were used in the 10,000 taxonomically  
286 completed trees (5911 species, ‘TopoCons’) while the DNA-only trees were estimated without  
287 topology constraints (4098 species, ‘TopoFree’).

288 **DNA gathering pipeline.** We used the BLAST algorithm (Basic Local Alignment Search  
289 Tool [66]) to efficiently query a local copy of NCBI’s nucleotide (nt) database, targeting 31 gene  
290 fragments (*SI Appendix*, Table S1) commonly sampled among mammals. Meredith et al. [41]  
291 was our starting point since their matrix included most extant families for 22 exons and 5 non-  
292 coding regions. We further targeted four protein-coding mitochondrial genes to maximize  
293 species-level sampling. For each gene, we used a set of pre-vetted sequences or ‘baits’ as queries  
294 for extracting homologous gene fragments from the NCBI database using the “blastn” executable  
295 (BLAST+ version 2.2.31) and the XML2 output format to assign taxonomic information for  
296 subsequent parsing.

297 **Synonym resolving and master taxonomy for this study.** The NCBI taxonomy of our  
298 genetic data contained many synonyms that required matching to accepted mammalian species  
299 prior to analysis. We based this matchup on a synonym list compiled from Catalogue of Life,  
300 MSW3 [67], and IUCN (total of 195,562 unique equivalencies; updated from Meyer et al. [68]).  
301 This procedure yielded direct matches for 75% of the NCBI names from our BLAST search. We  
302 matched an additional 765 names via manual reference to the literature and identified 1273  
303 species synonyms to yield a list of 4,217 accepted species with  $\geq 1$  sampled gene for subsequent  
304 error-checking. This taxonomic matchup also produced a master taxonomy of 5911 mammalian  
305 species for this study, of which 5,804 species are considered extant (*SI Appendix*, Table S2). The  
306 Mammal Diversity Database [69,70] ([mammaldiversity.org](http://mammaldiversity.org)) was an outgrowth of our project,  
307 and continues to update mammalian taxonomy as new literature is published.

308 **DNA sequence error-checking and alignment.** We used an iterative per-gene approach  
309 to clean annotation errors in NCBI, as follows: (i) sequence alignment, (ii) gene-tree construction

310 (RAxML v.8.2.3 [71]), and (iii) error-checking for stop codons and insufficient alignment  
311 overlap (Fig. 2a). In total, our error-checking steps excluded 1618 sequences across all genes  
312 (i.e., 7.2% of the 22,504 individual DNA sequences; *SI Appendix*, Table S1 and S3)  
313 corresponding to 119 species, and yielding 4098 species with  $\geq 1$  gene fragment validated in the  
314 final 31-gene matrix (Dataset S1 lists excluded sequences).

315 **Global DNA-only ML tree.** Phylogenetic analysis of the 4098-species DNA matrix was  
316 first performed in RAxML with the goal to identify the single best-supported topology for global  
317 mammals (*SI Appendix*, Table S4, Dataset S3). The supermatrix of 39,099 base pairs (bp) was  
318 11.9% complete in terms of ungapped sites, which was a level of missing data not expected to  
319 confound phylogeny estimation [72,73].

320 **Patch subclades and PASTIS completion of missing species.** Examination of well-  
321 supported nodes ( $>75\%$  bootstrap support) in the global ML tree informed our division of the  
322 mammalian phylogeny into 28 patch subclades [11]. Delimiting patches was an essential step for  
323 conducting Bayesian analyses on manageable tree sizes given that co-estimation upon  $\sim 1000$  or  
324 more species from our DNA supermatrix exceeded reasonable computational limits (*SI*  
325 *Appendix*, Fig. S2, Table S5). Taxonomic constraints for MrBayes v.3.2.6 [74] were formed with  
326 the R package PASTIS [65], reducing the potential for human error while identifying non-  
327 monophyletic genera in the global ML tree (see Dataset S4). Completed species' branch lengths  
328 were drawn from the same birth-death distribution as the rest of the patch clade, tending PASTIS  
329 completions conservatively to rate-constant processes while preserving the taxonomically  
330 expected tree shape [11,65].

331 **Fossil-dated backbone trees.** Two backbones were constructed: (i) node-dating (ND),  
332 using 17 fossil calibrations from Benton et al. [39], as augmented by Philips [75]; and (ii) tip-  
333 dating (fossilized birth-death, FBD [76]), using the morphological data set of Zhou et al. [40]  
334 trimmed to 76 fossil and 22 extant taxa (mostly Mesozoic fossils, 66–252 Ma). In both analyses,  
335 we focused on a common set of extant taxa to subset the full supermatrix for molecular  
336 characters (59 mammals, representing each of the 28 patch clades plus select family-level taxa  
337 with morphological data, and 1 outgroup *Anolis carolinensis*). ND and FBD analyses were  
338 conducted in MrBayes analogously to patch clades, and compared to test dating sensitivity (*SI*  
339 *Appendix*, Fig. S9, Table S6, Dataset S5).

340 **Construction of full dated mammalian phylogenies.** Tree distributions from the 28  
341 patch subclades (Completed TopoCons and DNA-only TopoFree) and two backbones (ND and  
342 FBD) was performed in ape [77], as outlined in the *SI Appendix*. Sets of 10,000 trees will be  
343 available in the phylogeny subsetting tool at [vertlife.org/phylosubsets](http://vertlife.org/phylosubsets) and temporarily at XXXX.

344 **Tests for diversification-rate variation or constancy**

345 **Tip-level speciation rates.** Following ref. [11] we calculated per-species estimates of  
346 expected pure-birth diversification rates for the instantaneous present moment (tips of the tree)  
347 using the inverse of the equal splits measure [11,12]. This metric has been called 'tip-level  
348 diversification rate' (tip DR) because it measures recent diversification processes among extant  
349 species [7]. However, to avoid confusion with 'net diversification', for which tip DR is  
350 misleading when extinction is very high (relative extinction  $>0.8$  [78]), we here refer to tip DR as  
351 a tip-level speciation rate metric. At the tip level, we show that tip DR is tightly associated with  
352 model-based estimators of speciation and net diversification rates in our trees (*SI Appendix*, Fig.  
353 S4a). At the clade-level, we measure 'clade tip speciation mean' as the harmonic mean of tip DR

354 among species, which is known to converge to the maximum likelihood estimator of pure-birth  
355 diversification rate in clades >10 species [11,12]. We show that clade tip DR mean indeed best  
356 approximates pure-birth clade rates for time-sliced clades in our mammal trees ( $R^2$ : ~0.7 versus  
357 ~0.5 for birth-death speciation and net diversification rates; *SI Appendix*, Fig. S4b).

358 **Lineage-specific rate shifts.** We performed searches for macroevolutionary shifts using  
359 BAMM v2.5 [50], a reversible-jump algorithm for sampling birth-death scenarios of variable rate  
360 regimes without a prior hypothesis. The phylogenetic uncertainty in our trees prompted us to  
361 evaluate the number and location of rate shifts on 10 trees from the node-dated sample. We  
362 summarized across the most likely shifts per tree—called maximum shift credibility (MSC) sets  
363 (*SI Appendix*, Fig. S15a)—using the ratio of the mean net diversification rate of all branches  
364 inside the shifted clade (clade rate) and outside that clade (background rate) to calculate the rate  
365 shift magnitude and direction for each MSC set (*SI Appendix*, Table S8 and Dataset S7; for tree-  
366 wide rate shifts, see *SI Appendix*, Fig. S15-S16).

367 **Fossil diversification.** To assess the congruence of our molecular phylogeny-based rate  
368 estimates with the fossil record, we analyzed Mammalia fossil occurrence data from the  
369 Paleobiology Database [79]. Grouping by genus after excluding ichnotaxa and uncertain genera,  
370 we recovered 71,928 occurrences of 5300 genera, which we then binned in 10-Ma intervals and  
371 used shareholder quorum subsampling (SQS [80]; quorum size: 0.5) to maximize the uniformity  
372 of coverage. Corresponding origination and extinction rates per stage were calculated using the  
373 per-capita rate method [81], and the oldest fossil per extant order was compared to stem ages in  
374 our node-dated phylogeny (*SI Appendix*, Fig. S13, Table S7).

375 **Likelihood tests of RC and RV models of diversification.** We analyzed the branching  
376 times of 27 named subclades (11 orders and 16 suborders) that contained  $\geq 25$  species. For each  
377 subclade, we tested 10 models developed by Morlon et al. [49]: two rate-constant (RC) models,  
378 constant PB and BD; and eight rate-variable (RV) models, with exponentially and linearly time-  
379 varying rates. We fit models for 100 trees of the empirical subclades and their matching RC-  
380 simulated trees (null models, simulated under the empirical extinction fractions of  $\sim \epsilon=0.65$  over  
381 100 trees using the “pbtree” function in phytools [82]). Subtracting AICc scores of the best-  
382 fitting RC and RV models provided the  $\Delta AIC_{RC-RV}$  test statistic per tree and subclade for  
383 comparison to the simulated null distribution ( $\alpha=0.05$ ; see *SI Appendix*, Table S9).

384 **Time-sliced clades and clade-level PGLS.** To objectively define clades, we arbitrarily  
385 drew lines (referred to as “time slices”) at 5-Ma intervals and took the resulting *tipward*  
386 monophyletic clades as non-nested units of analysis. The *rootward* relationships of those clades  
387 (the “rootward backbone”) was retained for each interval, giving the expected covariance  
388 structure among clades when performing phylogenetic generalized least squares (PGLS) analyses  
389 (*SI Appendix*, Fig. S5 for illustration). We used the “treeSlice” function in phytools to construct  
390 clade sets across Mammalia trees and the three sets of RC simulations, empirical ( $\epsilon=0.65$ ), low  
391 ( $\epsilon=0.2$ ), and high ( $\epsilon=0.8$ ), also comparing our results to analyses on traditional taxon-based  
392 clades (genera, families, and orders; *SI Appendix*, Fig. S18-S20). All PGLS was performed  
393 excluding extinct species, using Pagel’s “lambda” transformation in phylolm (optimized for large  
394 trees [83]), and repeating the analysis across 100 or 1000 trees.

395 **Tests for causes of diversification-rate variation**

396 **Mammalian trait data.** Our workflow for gathering trait data involved (i) unifying  
397 multiple trait taxonomies (e.g., EltonTraits v1.0 [84]) to our phylogeny’s master taxonomy; and



398 (ii) interpolating home range area and vagility to the species level using known allometric  
399 relationships in mammals (*SI Appendix*, Fig. S6, Dataset S7). Vagility was calculated as the  
400 maximum natal dispersal distance per individual (km) and interpolated for each species  
401 following our updated version of Whitmee and Orme's [85] best-fit equation, testing for  
402 collinearity prior to analyses (*SI Appendix*, Fig. S7).

403 **Tip-level correlates of diversification rates.** To better understand correlative structures  
404 underlying the observed rate variation, we performed tip-level PGLS analyses between species'  
405 ecological traits and tip DR values across 1000 trees, focusing on a 5675-species data set that  
406 excluded all extinct (n=107) and marine (n=129) species. We followed Freckleton et al. [8] in  
407 using trait ~ rate models in our tip-level PGLS analyses to avoid identical residuals in the  
408 dependent variable (i.e., sister species have identical tip DR values, violating the assumption of  
409 within-variable data independence in bivariate normal distributions). The trait ~ rate approach  
410 has been applied using tip DR in univariate contexts [86] (see *SI Appendix*, Fig. S21 for  
411 sensitivity tests).

412 **Clade-level correlates of diversification rates.** At the clade level, univariate PGLS was  
413 performed typically (rate ~ trait models), since clade tip DR mean gave independent values to  
414 sister clades. These analyses were conducted on 1000 trees by analogy with those previous,  
415 except that per-clade trait summaries were the standardized predictors (geometric means for  
416 vagility, otherwise arithmetic means). We also performed tests for trait-dependent diversification  
417 using rate-shifted clades identified in BAMM runs on 10 mammal trees (STRAPP [87] method),  
418 which corrects for phylogenetic pseudoreplication similar to PGLS except considering only the  
419 covariance structure among rate regimes (see *SI Appendix*, Fig. S17).

420 **Phylogenetic path analyses.** Path analysis aims to fully resolve correlational structures  
421 and thereby translate from the language of statistical probability to causality. In phylogenetic  
422 path analyses, we used PGLS to test statements of conditional independence [60] across 27 pre-  
423 selected path models (*SI Appendix*, Fig. S8). For each tree and clade set, we used "phylopath"  
424 [88] to analyze models and perform conditional model averaging. Time-sliced clades at 10-, 30-,  
425 and 50-Ma intervals were analyzed along with taxon-based clades (*SI Appendix*, Fig. S20, S22).

#### 426 **Data availability**

427 All data and code is available in the manuscript, supplementary materials, and after  
428 publication on Dryad (all code will be available at [github.com/n8upham/](https://github.com/n8upham/)).

429

#### 430 **Acknowledgments**

431 We thank I. Quintero, M. Landis, D. Schluter, A. Mooers, A. Pyron, G. Thomas, D.  
432 Greenberg, and E. Florsheim for conceptual discussions that improved this study; B. Patterson,  
433 K. Rowe, J. Brown, T. Colston, T. Peterson, D. Field, T. Stewart, J. Davies, and three  
434 anonymous reviewers for comments on earlier drafts; S. Upham for improving figure design; C.  
435 Meyer for his synonym list; and M. Koo, A. Ranipeta, J. Hart, M. Swanson, C. Burgin, and J.  
436 Colella for database help. Artwork from phylopic.org and open source fonts. The NSF VertLife  
437 Terrestrial grant to W.J. and J.E. (DEB 1441737 and 1441634) and NSF grant DBI-1262600 to  
438 W.J. supported this work.

439 **References**

- 440 1. Willis JC. Age and Area. Cambridge: Cambridge University Press; 1922.
- 441 2. Mooers AO, Heard SB. Inferring Evolutionary Process from Phylogenetic Tree Shape. *Q*  
442 *Rev Biol.* 1997;72: 31–54.
- 443 3. Mittelbach GG, Schemske DW, Cornell HV, Allen AP, Brown JM, Bush MB, et al.  
444 Evolution and the latitudinal diversity gradient: speciation, extinction and biogeography.  
445 *Ecol Lett.* 2007;10: 315–331. doi:10.1111/j.1461-0248.2007.01020.x
- 446 4. Rabosky DL, Slater GJ, Alfaro ME. Clade age and species richness are decoupled across the  
447 eukaryotic tree of life. *PLoS Biol.* 2012;10: e1001381.
- 448 5. Purvis A, Fritz SA, Rodríguez J, Harvey PH, Grenyer R. The shape of mammalian  
449 phylogeny: patterns, processes and scales. *Philos Trans R Soc Lond B Biol Sci.* 2011;366:  
450 2462–2477. doi:10.1098/rstb.2011.0025
- 451 6. Simpson GG. The major features of evolution. New York: Columbia Univ Press; 1953.
- 452 7. Quintero I, Jetz W. Global elevational diversity and diversification of birds. *Nature.* 2018;
- 453 8. Freckleton RP, Phillimore AB, Pagel M. Relating Traits to Diversification: A Simple Test.  
454 *Am Nat.* 2008;172: 102–115. doi:10.1086/588076
- 455 9. Jablonski D. Species Selection: Theory and Data. *Annu Rev Ecol Evol Syst.* 2008;39: 501–  
456 524. doi:10.1146/annurev.ecolsys.39.110707.173510
- 457 10. Rabosky DL. Automatic Detection of Key Innovations, Rate Shifts, and Diversity-  
458 Dependence on Phylogenetic Trees. *PLOS ONE.* 2014;9: e89543.  
459 doi:10.1371/journal.pone.0089543
- 460 11. Jetz W, Thomas GH, Joy JB, Hartmann K, Mooers AO. The global diversity of birds in  
461 space and time. *Nature.* 2012;491: 444–448. doi:10.1038/nature11631
- 462 12. Steel M, Mooers A. The expected length of pendant and interior edges of a Yule tree. *Appl*  
463 *Math Lett.* 2010;23: 1315–1319. doi:10.1016/j.aml.2010.06.021
- 464 13. Schluter D, Pennell MW. Speciation gradients and the distribution of biodiversity. *Nature.*  
465 2017;546: 48–55. doi:10.1038/nature22897
- 466 14. Weir JT, Schluter D. The Latitudinal Gradient in Recent Speciation and Extinction Rates of  
467 Birds and Mammals. *Science.* 2007;315: 1574–1576. doi:10.1126/science.1135590
- 468 15. Rabosky DL, Chang J, Title PO, Cowman PF, Sallan L, Friedman M, et al. An inverse  
469 latitudinal gradient in speciation rate for marine fishes. *Nature.* 2018; 1.  
470 doi:10.1038/s41586-018-0273-1

- 471 16. Rosenblum EB, Sarver BAJ, Brown JW, Roches SD, Hardwick KM, Hether TD, et al.  
472 Goldilocks Meets Santa Rosalia: An Ephemeral Speciation Model Explains Patterns of  
473 Diversification Across Time Scales. *Evol Biol.* 2012;39: 255–261. doi:10.1007/s11692-  
474 012-9171-x
- 475 17. Yoder JB, Clancey E, Des Roches S, Eastman JM, Gentry L, Godsoe W, et al. Ecological  
476 opportunity and the origin of adaptive radiations. *J Evol Biol.* 2010;23: 1581–1596.
- 477 18. Schluter D. *The ecology of adaptive radiation.* Oxford, UK: Oxford University Press; 2000.
- 478 19. Mayr E. *Animal species and evolution.* Cambridge, MA: Belknap; 1963.
- 479 20. Jablonski D. Larval ecology and macroevolution in marine invertebrates. *Bull Mar Sci.*  
480 1986;39: 565–587.
- 481 21. Claramunt S, Derryberry EP, Remsen JV, Brumfield RT. High dispersal ability inhibits  
482 speciation in a continental radiation of passerine birds. *Proc R Soc Lond B Biol Sci.*  
483 2012;279: 1567–1574. doi:10.1098/rspb.2011.1922
- 484 22. Bininda-Emonds ORP. The evolution of supertrees. *Trends Ecol Evol.* 2004;19: 315–322.  
485 doi:10.1016/j.tree.2004.03.015
- 486 23. Bininda-Emonds ORP, Cardillo M, Jones KE, MacPhee RDE, Beck RMD, Grenyer R, et al.  
487 The delayed rise of present-day mammals. *Nature.* 2007;446: 507–512.  
488 doi:10.1038/nature05634
- 489 24. Fritz SA, Bininda-Emonds ORP, Purvis A. Geographical variation in predictors of  
490 mammalian extinction risk: big is bad, but only in the tropics. *Ecol Lett.* 2009;12: 538–549.  
491 doi:10.1111/j.1461-0248.2009.01307.x
- 492 25. Kuhn TS, Mooers AØ, Thomas GH. A simple polytomy resolver for dated phylogenies.  
493 *Methods Ecol Evol.* 2011;2: 427–436. doi:10.1111/j.2041-210X.2011.00103.x
- 494 26. Stadler T. Mammalian phylogeny reveals recent diversification rate shifts. *Proc Natl Acad*  
495 *Sci.* 2011;108: 6187–6192. doi:10.1073/pnas.1016876108
- 496 27. Hedges SB, Marin J, Suleski M, Paymer M, Kumar S. Tree of life reveals clock-like  
497 speciation and diversification. *Mol Biol Evol.* 2015; msv037. doi:10.1093/molbev/msv037
- 498 28. Faurby S, Svenning J-C. A species-level phylogeny of all extant and late Quaternary extinct  
499 mammals using a novel heuristic-hierarchical Bayesian approach. *Mol Phylogenet Evol.*  
500 2015;84: 14–26. doi:10.1016/j.ympev.2014.11.001
- 501 29. Marin J, Rapacciuolo G, Costa GC, Graham CH, Brooks TM, Young BE, et al. Evolutionary  
502 time drives global tetrapod diversity. *Proc R Soc B.* 2018;285: 20172378.  
503 doi:10.1098/rspb.2017.2378

- 504 30. Tonini JFR, Beard KH, Ferreira RB, Jetz W, Pyron RA. Fully-sampled phylogenies of  
505 squamates reveal evolutionary patterns in threat status. *Biol Conserv.* 2016;204: 23–31.  
506 doi:10.1016/j.biocon.2016.03.039
- 507 31. Jetz W, Pyron RA. The interplay of past diversification and evolutionary isolation with  
508 present imperilment across the amphibian tree of life. *Nat Ecol Evol.* 2018;
- 509 32. Rabosky DL, Mitchell JS, Chang J. Is BAMM Flawed? Theoretical and Practical Concerns  
510 in the Analysis of Multi-Rate Diversification Models. *Syst Biol.* 2017;66: 477–498.  
511 doi:10.1093/sysbio/syx037
- 512 33. Moore BR, Höhna S, May MR, Rannala B, Huelsenbeck JP. Critically evaluating the theory  
513 and performance of Bayesian analysis of macroevolutionary mixtures. *Proc Natl Acad Sci.*  
514 2016;113: 9569–9574. doi:10.1073/pnas.1518659113
- 515 34. Beaulieu JM, O’Meara BC. Extinction can be estimated from moderately sized molecular  
516 phylogenies. *Evolution.* 2015;69: 1036–1043. doi:10.1111/evo.12614
- 517 35. Rabosky DL. Extinction rate should not be estimated from molecular phylogenies.  
518 *Evolution.* 2010;64: 1816–1824.
- 519 36. Rabosky DL, Goldberg EE. Model Inadequacy and Mistaken Inferences of Trait-Dependent  
520 Speciation. *Syst Biol.* 2015;64: 340–355. doi:10.1093/sysbio/syu131
- 521 37. Beaulieu JM, O’Meara BC. Detecting Hidden Diversification Shifts in Models of Trait-  
522 Dependent Speciation and Extinction. *Syst Biol.* 2016;65: 583–601.  
523 doi:10.1093/sysbio/syw022
- 524 38. Hodges SA, Arnold ML. Spurring plant diversification: are floral nectar spurs a key  
525 innovation? *Proc R Soc Lond B Biol Sci.* 1995;262: 343–348.
- 526 39. Benton MJ, Donoghue PCJ, Asher RJ, Friedman M, Near TJ, Vinther J. Constraints on the  
527 timescale of animal evolutionary history. *Palaeontol Electron.* 2015;18.
- 528 40. Zhou C-F, Wu S, Martin T, Luo Z-X. A Jurassic mammaliaform and the earliest mammalian  
529 evolutionary adaptations. *Nature.* 2013;500: 163–167. doi:10.1038/nature12429
- 530 41. Meredith RW, Janečka JE, Gatesy J, Ryder OA, Fisher CA, Teeling EC, et al. Impacts of the  
531 Cretaceous Terrestrial Revolution and KPg Extinction on Mammal Diversification.  
532 *Science.* 2011;334: 521–524. doi:10.1126/science.1211028
- 533 42. Archibald JD, Deutschman DH. Quantitative Analysis of the Timing of the Origin and  
534 Diversification of Extant Placental Orders. *J Mamm Evol.* 2001;8: 107–124.  
535 doi:10.1023/A:1011317930838
- 536 43. dos Reis M, Inoue J, Hasegawa M, Asher RJ, Donoghue PCJ, Yang Z. Phylogenomic  
537 datasets provide both precision and accuracy in estimating the timescale of placental

- 538 mammal phylogeny. Proc R Soc Lond B Biol Sci. 2012;279: 3491–3500.  
539 doi:10.1098/rspb.2012.0683
- 540 44. Grossnickle DM, Newham E. Therian mammals experience an ecomorphological radiation  
541 during the Late Cretaceous and selective extinction at the K–Pg boundary. Proc R Soc B.  
542 2016;283: 20160256. doi:10.1098/rspb.2016.0256
- 543 45. Pires MM, Rankin BD, Silvestro D, Quental TB. Diversification dynamics of mammalian  
544 clades during the K–Pg mass extinction. Biol Lett. 2018;14: 20180458.  
545 doi:10.1098/rsbl.2018.0458
- 546 46. Kalmar A, Currie DJ. The Completeness of the Continental Fossil Record and Its Impact on  
547 Patterns of Diversification. Paleobiology. 2010;36: 51–60.
- 548 47. Alroy J. The Fossil Record of North American Mammals: Evidence for a Paleocene  
549 Evolutionary Radiation. Syst Biol. 1999;48: 107–118. doi:10.1080/106351599260472
- 550 48. Nee S, May RH, Harvey PH. The reconstructed evolutionary process. Philos Trans R Soc  
551 Lond B-Biol Sci. 1994;344: 305–311.
- 552 49. Morlon H, Parsons TL, Plotkin JB. Reconciling molecular phylogenies with the fossil record.  
553 Proc Natl Acad Sci. 2011;108: 16327–16332. doi:10.1073/pnas.1102543108
- 554 50. Rabosky DL. Automatic detection of key innovations, rate shifts, and diversity-dependence  
555 on phylogenetic trees. PLoS ONE. 2014;9: e89543.
- 556 51. Katz ME, Miller KG, Wright JD, Wade BS, Browning JV, Cramer BS, et al. Stepwise  
557 transition from the Eocene greenhouse to the Oligocene icehouse. Nat Geosci. 2008;1: 329–  
558 334. doi:10.1038/ngeo179
- 559 52. Venditti C, Meade A, Pagel M. Multiple routes to mammalian diversity. Nature. 2011;479:  
560 393–396. doi:10.1038/nature10516
- 561 53. Ricklefs RE. Global diversification rates of passerine birds. Proc R Soc Lond B-Biol Sci.  
562 2003;270: 2285–2291.
- 563 54. Price TD. The roles of time and ecology in the continental radiation of the Old World leaf  
564 warblers (*Phylloscopus* and *Seicercus*). Philos Trans R Soc Lond B Biol Sci. 2010;365:  
565 1749–1762. doi:10.1098/rstb.2009.0269
- 566 55. Nee S, Holmes EC, May RM, Harvey PH. Extinction rates can be estimated from molecular  
567 phylogenies. Philos Trans R Soc Lond B-Biol Sci. 1994;344: 77–82.
- 568 56. Venditti C, Meade A, Pagel M. Phylogenies reveal new interpretation of speciation and the  
569 Red Queen. Nature. 2010;463: 349–352. doi:10.1038/nature08630

- 570 57. Gerkema MP, Davies WIL, Foster RG, Menaker M, Hut RA. The nocturnal bottleneck and  
571 the evolution of activity patterns in mammals. *Proc R Soc B*. 2013;280: 20130508.  
572 doi:10.1098/rspb.2013.0508
- 573 58. Kisel Y, Barraclough TG. Speciation Has a Spatial Scale That Depends on Levels of Gene  
574 Flow. *Am Nat*. 2010;175: 316–334. doi:10.1086/650369
- 575 59. Jablonski D. Heritability at the Species Level: Analysis of Geographic Ranges of Cretaceous  
576 Mollusks. *Science*. 1987;238: 360–363. doi:10.1126/science.238.4825.360
- 577 60. von Hardenberg A, Gonzalez-Voyer A. Disentangling Evolutionary Cause-Effect  
578 Relationships with Phylogenetic Confirmatory Path Analysis. *Evolution*. 2013;67: 378–  
579 387. doi:10.1111/j.1558-5646.2012.01790.x
- 580 61. Hewitt G. The genetic legacy of the Quaternary ice ages. *Nature*. 2000;405: 907–913.  
581 doi:10.1038/35016000
- 582 62. Marcot JD, Fox DL, Niebuhr SR. Late Cenozoic onset of the latitudinal diversity gradient of  
583 North American mammals. *Proc Natl Acad Sci*. 2016;113: 7189–7194.  
584 doi:10.1073/pnas.1524750113
- 585 63. Maor R, Dayan T, Ferguson-Gow H, Jones KE. Temporal niche expansion in mammals from  
586 a nocturnal ancestor after dinosaur extinction. *Nat Ecol Evol*. 2017;1: 1889.  
587 doi:10.1038/s41559-017-0366-5
- 588 64. Arbour JH, Santana SE. A major shift in diversification rate helps explain macroevolutionary  
589 patterns in primate species diversity. *Evolution*. 2017;71: 1600–1613.  
590 doi:10.1111/evo.13237
- 591 65. Thomas GH, Hartmann K, Jetz W, Joy JB, Mimoto A, Mooers AO. PASTIS: an R package  
592 to facilitate phylogenetic assembly with soft taxonomic inferences. *Methods Ecol Evol*.  
593 2013;4: 1011–1017. doi:10.1111/2041-210X.12117
- 594 66. Altschul SF, Madden TL, Schaffer AA, Zhang J, Zhang Z, Miller W, et al. Gapped BLAST  
595 and PSI-BLAST: a new generation of protein database search programs. *Nucleic Acids Res*.  
596 1997;25: 3389–3402.
- 597 67. Wilson DE, Reeder DM. *Mammal species of the world: a taxonomic and geographic  
598 reference*, 3rd ed. 3rd ed. Baltimore, MD: Johns Hopkins University Press; 2005.
- 599 68. Meyer C, Kreft H, Guralnick R, Jetz W. Global priorities for an effective information basis  
600 of biodiversity distributions. *Nat Commun*. 2015;6: 8221. doi:10.1038/ncomms9221
- 601 69. Burgin CJ, Colella JP, Kahn PL, Upham NS. How many species of mammals are there? *J  
602 Mammal*. 2018;99: 1–14. doi:10.1093/jmammal/gyx147
- 603 70. Mammal Diversity Database. American Society of Mammalogists, Mammal Diversity  
604 Database [Internet]. 2018 [cited 2 Jun 2018]. Available: <https://mammaldiversity.org/>

- 605 71. Stamatakis A. RAxML version 8: a tool for phylogenetic analysis and post-analysis of large  
606 phylogenies. *Bioinformatics*. 2014;30: 1312–1313. doi:10.1093/bioinformatics/btu033
- 607 72. Wiens JJ, Morrill MC. Missing Data in Phylogenetic Analysis: Reconciling Results from  
608 Simulations and Empirical Data. *Syst Biol*. 2011; syr025. doi:10.1093/sysbio/syr025
- 609 73. Roure B, Baurain D, Philippe H. Impact of Missing Data on Phylogenies Inferred from  
610 Empirical Phylogenomic Data Sets. *Mol Biol Evol*. 2013;30: 197–214.  
611 doi:10.1093/molbev/mss208
- 612 74. Ronquist F, Teslenko M, Mark P van der, Ayres DL, Darling A, Höhna S, et al. MrBayes  
613 3.2: Efficient Bayesian Phylogenetic Inference and Model Choice across a Large Model  
614 Space. *Syst Biol*. 2012; sys029. doi:10.1093/sysbio/sys029
- 615 75. Phillips MJ. Four mammal fossil calibrations: balancing competing palaeontological and  
616 molecular considerations. *Palaeontol Electron*. 2015;18: 1–16.  
617 doi:<https://doi.org/10.26879/490>
- 618 76. Heath TA, Huelsenbeck JP, Stadler T. The fossilized birth–death process for coherent  
619 calibration of divergence-time estimates. *Proc Natl Acad Sci*. 2014;111: E2957–E2966.  
620 doi:10.1073/pnas.1319091111
- 621 77. Paradis E, Claude J, Strimmer K. APE: Analyses of Phylogenetics and Evolution in R  
622 language. *Bioinformatics*. 2004;20: 289–290.
- 623 78. Title PO, Rabosky D. Tip rates, phylogenies and diversification: what are we estimating, and  
624 how good are the estimates? *bioRxiv*. 2018; 369124. doi:10.1101/369124
- 625 79. Alroy J, Uhen MD, Mannion PD, Jaramillo C, Carrano MT, van den Hoek Ostende LW.  
626 Taxonomic occurrences of Mammalia recorded in Fossilworks, the Evolution of Terrestrial  
627 Ecosystems database, and the Paleobiology Database. *Fossilworks*. <http://fossilworks.org>.  
628 2018;
- 629 80. Alroy J. Accurate and precise estimates of origination and extinction rates. *Paleobiology*.  
630 2014;40: 374–397. doi:10.1666/13036
- 631 81. Foote M. Origination and extinction components of taxonomic diversity: general problems.  
632 *Paleobiology*. 2000;26: 74–102. doi:10.1666/0094-8373(2000)26[74:OAEcot]2.0.CO;2
- 633 82. Revell LJ. phytools: an R package for phylogenetic comparative biology (and other things).  
634 *Methods Ecol Evol*. 2012;3: 217–223.
- 635 83. Ho LST, Ané C. A Linear-Time Algorithm for Gaussian and Non-Gaussian Trait Evolution  
636 Models. *Syst Biol*. 2014;63: 397–408. doi:10.1093/sysbio/syu005
- 637 84. Wilman H, Belmaker J, Simpson J, de la Rosa C, Rivadeneira MM, Jetz W. EltonTraits 1.0:  
638 Species-level foraging attributes of the world’s birds and mammals. *Ecology*. 2014;95:  
639 2027–2027. doi:10.1890/13-1917.1

- 640 85. Whitmee S, Orme CDL. Predicting dispersal distance in mammals: a trait-based approach. *J*  
641 *Anim Ecol.* 2013;82: 211–221. doi:10.1111/j.1365-2656.2012.02030.x
- 642 86. Harvey MG, Seeholzer GF, Smith BT, Rabosky DL, Cuervo AM, Brumfield RT. Positive  
643 association between population genetic differentiation and speciation rates in New World  
644 birds. *Proc Natl Acad Sci.* 2017;114: 6328–6333. doi:10.1073/pnas.1617397114
- 645 87. Rabosky DL, Huang H. A Robust Semi-Parametric Test for Detecting Trait-Dependent  
646 Diversification. *Syst Biol.* 2016;65: 181–193. doi:10.1093/sysbio/syv066
- 647 88. van der Bijl W. phylopath: Easy phylogenetic path analysis in R. *PeerJ.* 2018;6: e4718.  
648 doi:10.7717/peerj.4718
- 649



## 650 **Figure legends**

651 **Fig. 1. Species-level relationships and tempo of diversification across mammals.** The node-  
652 dated analysis of 5911 species shows branches colored with tip-level speciation rates (tip DR  
653 metric) and marked with 24 shifts in lineage-specific diversification rates (labels A-X; shifts with  
654 multiple circles occurred on either branch, not both). Tip-level rates are reconstructed to interior  
655 branches using Brownian motion for visual purposes only. The maximum clade credibility  
656 topology of 10,000 trees is shown, and numbered clade labels correspond to orders and subclades  
657 listed in the plot periphery: Mars, Marsupialia; X, Xenarthra; Afro, Afrotheria; Laur,  
658 Laurasiatheria; Euar, Euarchontoglires. Scale in millions of years, Ma.

659 **Fig. 2. Building the backbone-and-patch Mammalia phylogenies.** (a) Schematic overview of  
660 DNA sequence gathering from NCBI, taxonomic matchup, iterative error checking, and  
661 estimating a global maximum-likelihood (ML) tree from the resulting supermatrix (31 genes by  
662 4098 species [71]). Subclade (patch) phylogenies were then delimited, estimated using Bayesian  
663 inference [74], and joined to fossil-calibrated backbone trees (node- or tip-dated). The resulting  
664 posterior samples of 10,000 fully dated phylogenies either had the global ML tree topology  
665 constrained (completed trees of 5911 species, ‘TopoCons’) or no topology constraints (DNA-  
666 only trees, ‘TopoFree’). (b) Backbone trees contained topological and age uncertainty, including  
667 the unresolved base of Placentalia (e.g., [41]), slightly favoring the Atlantogenata hypothesis  
668 (blue) versus Exafroplacentalia (red). (c) Bayesian phylogenies of 28 patch clades were  
669 separately estimated in relative-time units for re-scaling to representative divergence times on the  
670 backbone. Combining sets of backbones and patch clades yielded four posterior distributions for  
671 analysis (see *SI Appendix*, Fig. S9-12).

672 **Fig. 3. Diversification rate variation among mammal clades.** Lineage-through-time plots and  
673 estimated crown ages for (a) all superordinal divergences, and (b) placental orders with crown  
674 age estimates overlapping the Cretaceous-Paleogene extinction event (K-Pg, dashed gray line;  
675 means and 95% CIs; filled circle if statistically different). (c) Rate-through-time plots for  
676 speciation, extinction, and net diversification (summarized from Fig. 1 rate shifts; medians from  
677 10 trees, 95% CIs in light gray). (d) Fossil genus diversity through time for all Mammalia,  
678 including subsampled genus richness (quorum 0.5) and per-capita rates of genus origination and  
679 extinction. (e) Extant rates and lineage-specific rate shifts for the five most speciose mammal  
680 orders (same symbols as in c). (f) Rate variation within subclades of these five orders as  
681 numbered from Fig. 1; left: difference in AIC between best-fit models of diversification for trees  
682 simulated under rate-constant birth-death (gray) versus observed mammal trees (color; filled  
683 circle and \* if  $\Delta$ AIC on 100 trees is statistically different); and, right: tip-level speciation rate (tip  
684 DR metric) distributions of the same simulated and observed subclades (gray versus color, one  
685 tree), comparing variation in clade tip rate mean and skew across 100 trees. The last 2 Ma are  
686 removed from parts c-e for clarity.

687 **Fig. 4. Age and rate components of species richness variation across time-slice defined**  
688 **clades.** (a) The log species richness of clades tipward of each 5-Ma time slice (dotted lines from  
689 5-70 Ma) across a sample of 100 phylogenies (maximum clade credibility tree shown) is best  
690 predicted jointly by (b) clade crown age, (c) the clade harmonic mean of tip speciation rates (tip  
691 DR mean), and (d) the clade skew of tip speciation rates (tip DR skew). Multivariate  
692 phylogenetic analyses of clade richness in observed trees (gray) is compared to trees simulated  
693 under rate-constant birth and death with different extinction fractions,  $\epsilon$  (colors in legend; PGLS  
694 on standardized data with 95% confidence intervals [CIs] on parameter estimates). Solid black

695 lines are the observed best-fitting models given random effects of time slice and tree. Insets (**b** to  
696 **d**) are examples from 35-Ma clades (red line) showing the bivariate plots underlying each  
697 multivariate PGLS slope per tree and time slice.

698 **Fig. 5. Ecological drivers of (a) tip speciation rates and (b) clade speciation rates and**  
699 **species richness.** (a, top panel) Distribution of tip-level speciation rates (tip DR metric,  
700 harmonic mean of 10,000 trees) relative to per-species estimates of vagility (maximum natal  
701 dispersal distance), diurnality (0=nocturnal or cathemeral, 1=diurnal), and absolute value of  
702 latitude (centroid of expert maps) across 5,675 species (excluding extinct and marine species).  
703 Loess smoothing lines visualize general trends (blue, span=0.33). Tip-level effects (bottom  
704 panel) from univariate PGLS between tip speciation rates and ecological traits subset across  
705 trophic levels (1000 trees, 95% CI, colored if significant). (b) Phylogenetic path analysis [60] of  
706 putative causal relationships between traits and rates leading to clade species richness for time-  
707 sliced clades. Path thickness, color, and directionality denote median coefficients of model-  
708 averaged analyses. The bottom panels provide per-estimate uncertainty across time slices (slope  
709  $\pm$  SE, 1000 trees). Non-zero estimates, either positive (blue shades) or negative (red shades), are  
710 totaled in the right margin; paths present in >500 trees are bolded and displayed in path model  
711 whereas others are dashed.

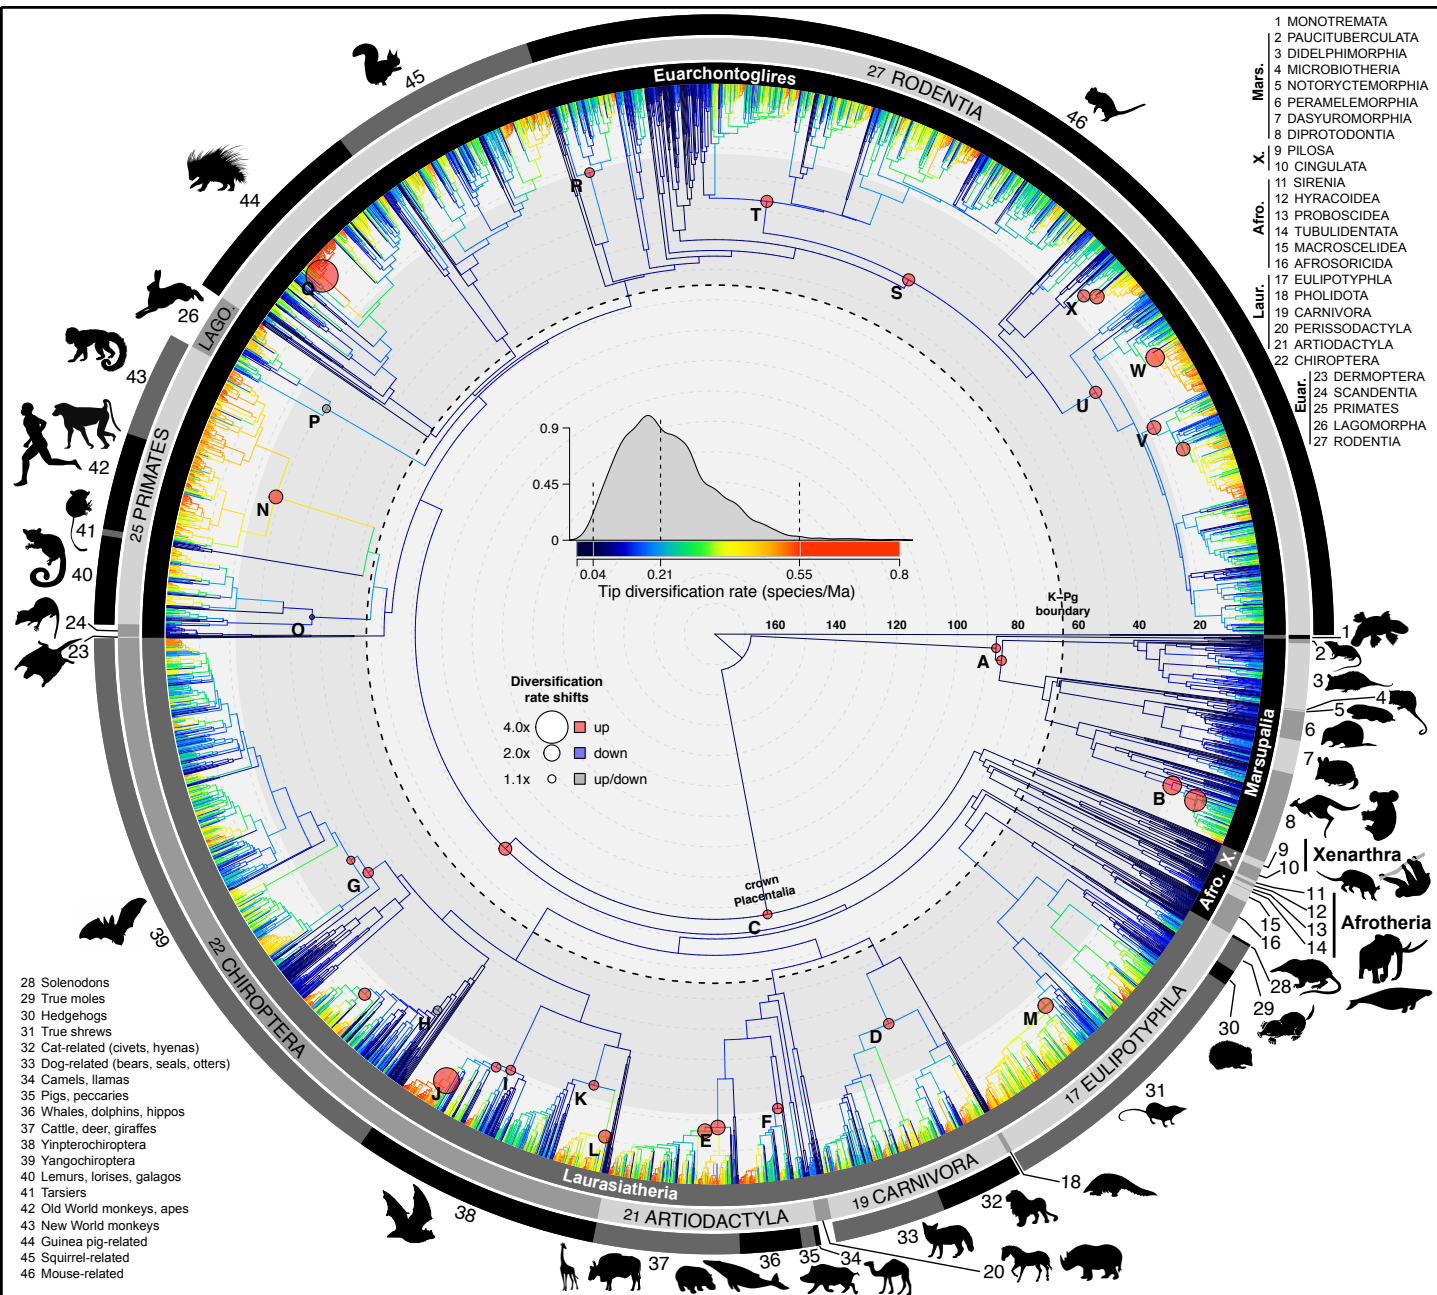

## a Tree-building overview

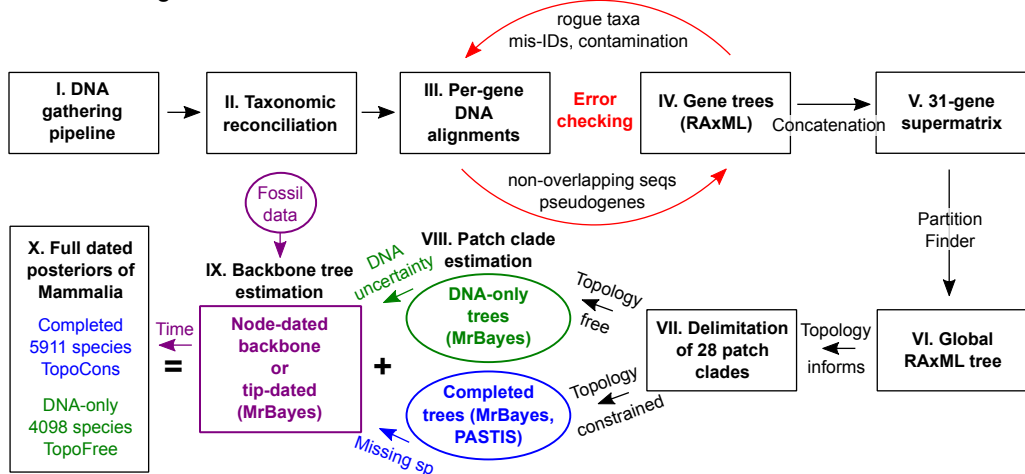

## b Node-dated backbone

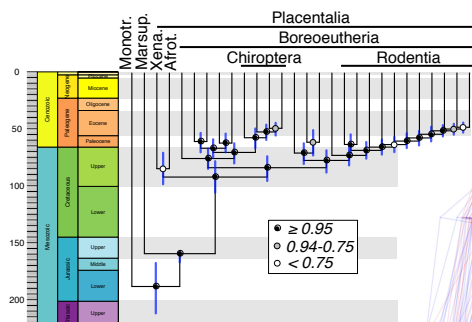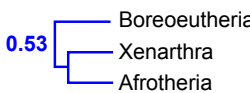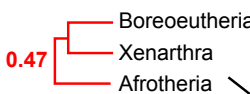

## c 28 patch clade phylogenies

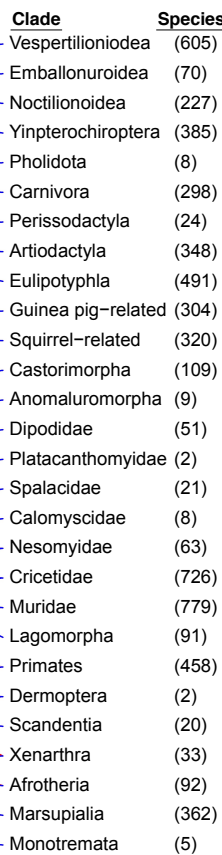

150 100 50 0 Millions of years (Ma)

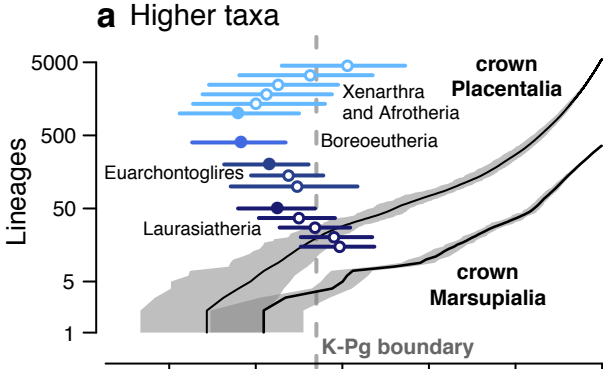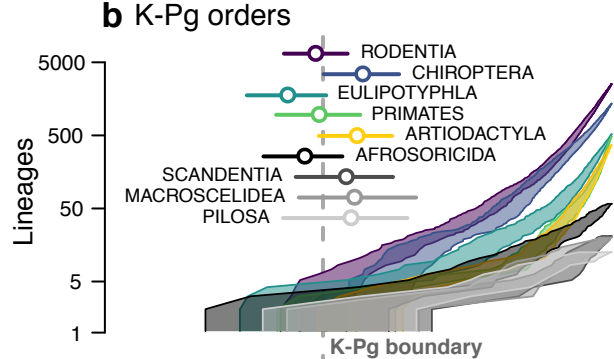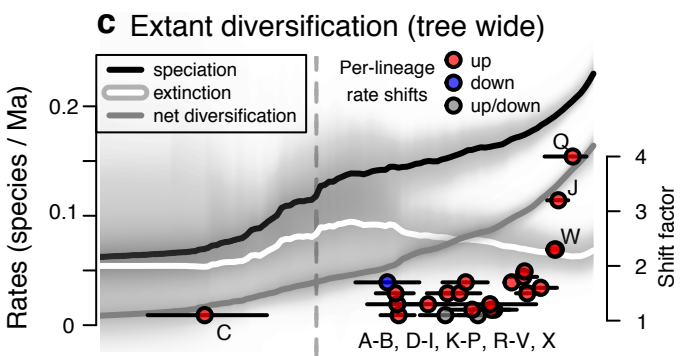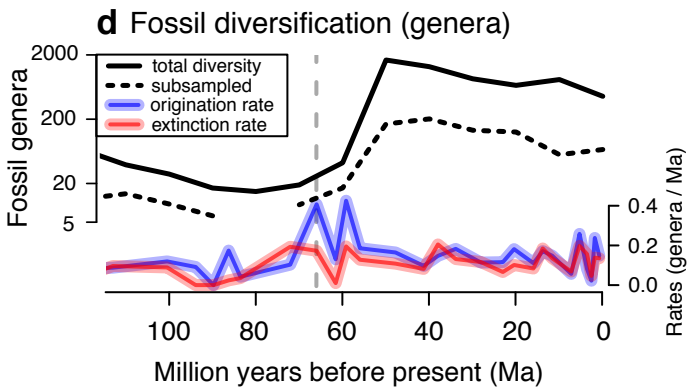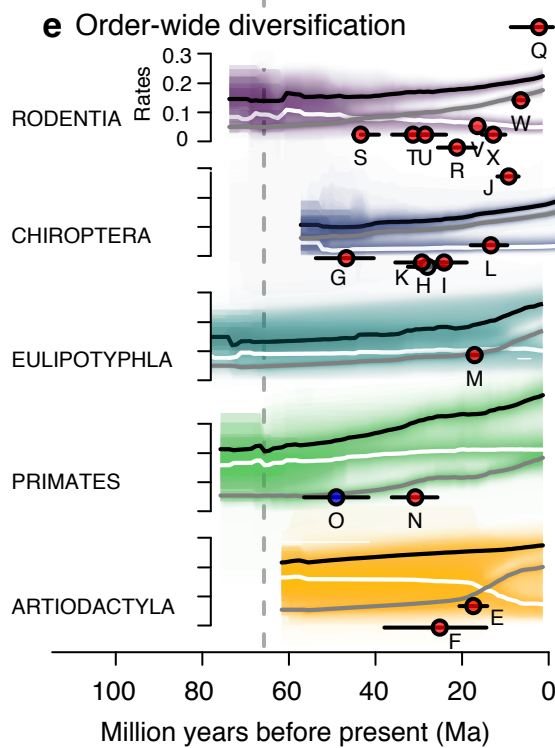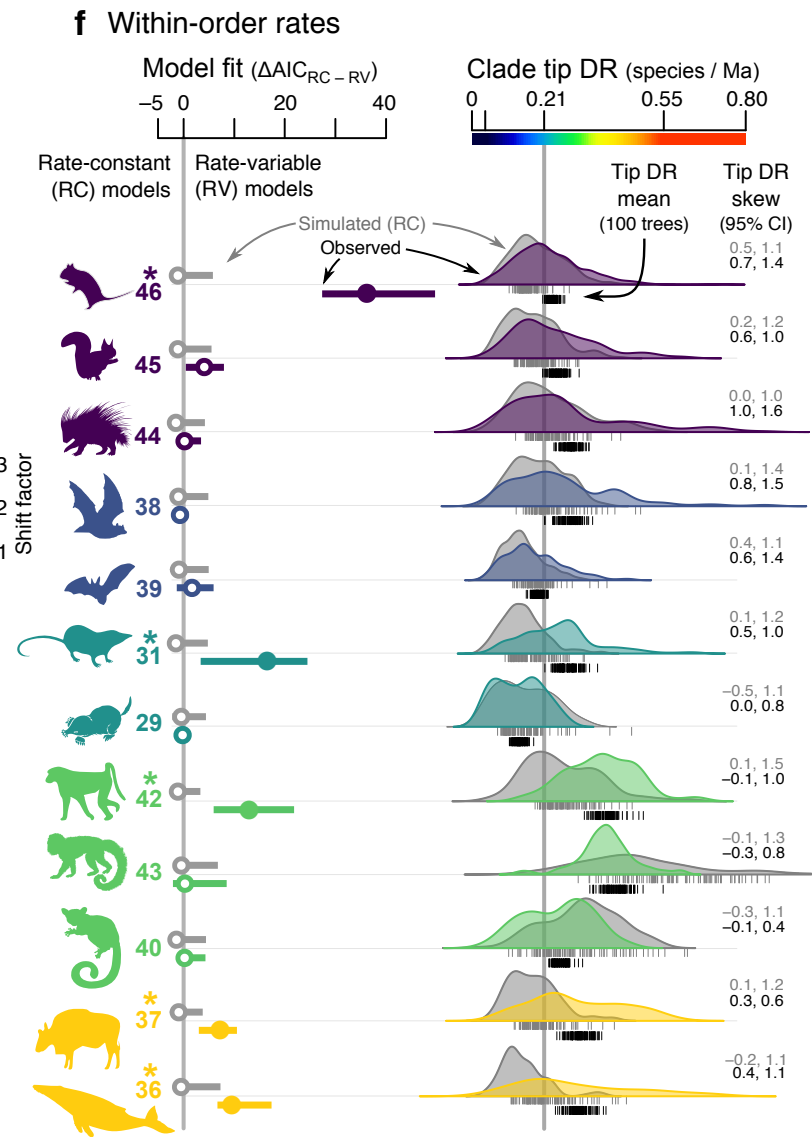

# a 100 mammal phylogenies

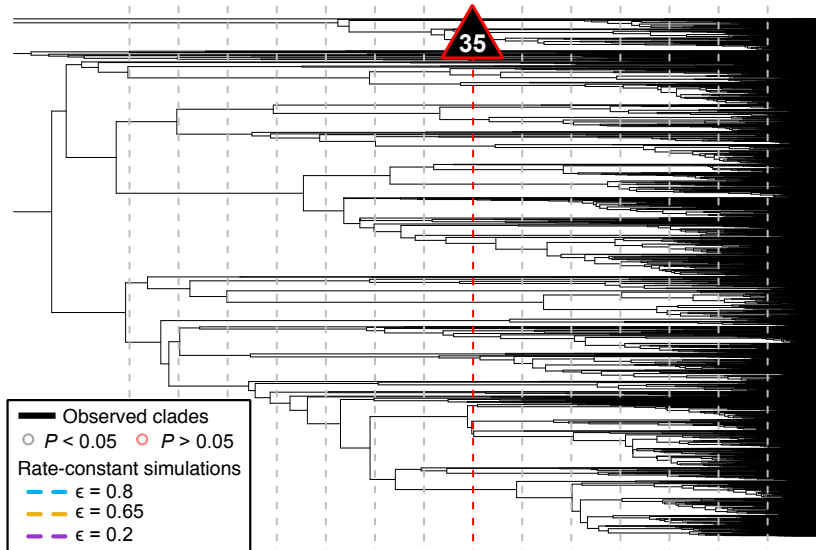

## b Crown age

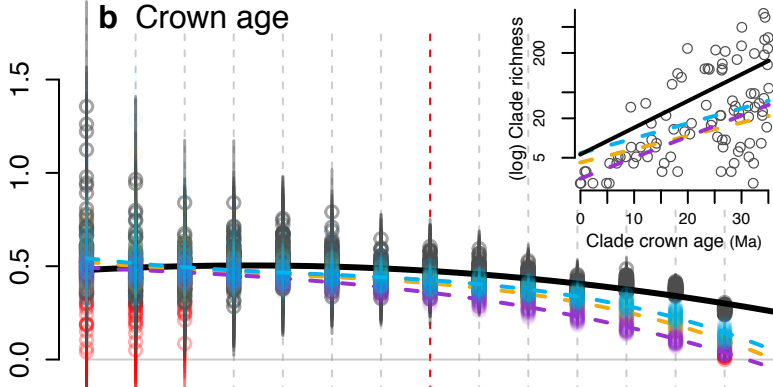

## c Tip DR mean

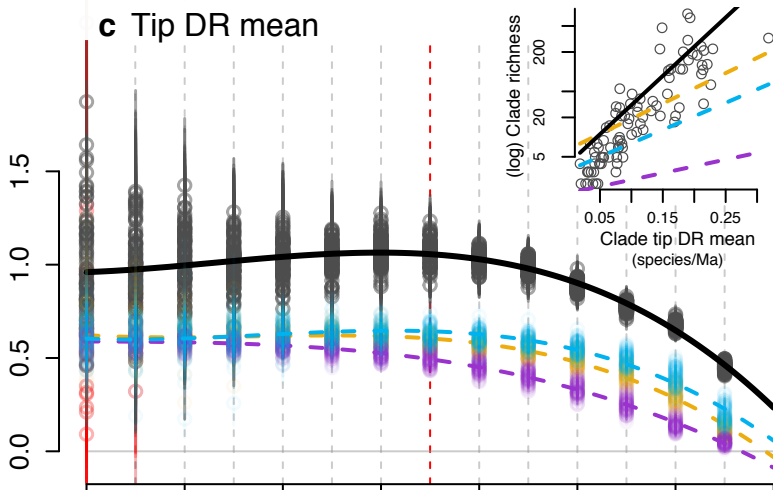

## d Tip DR skew

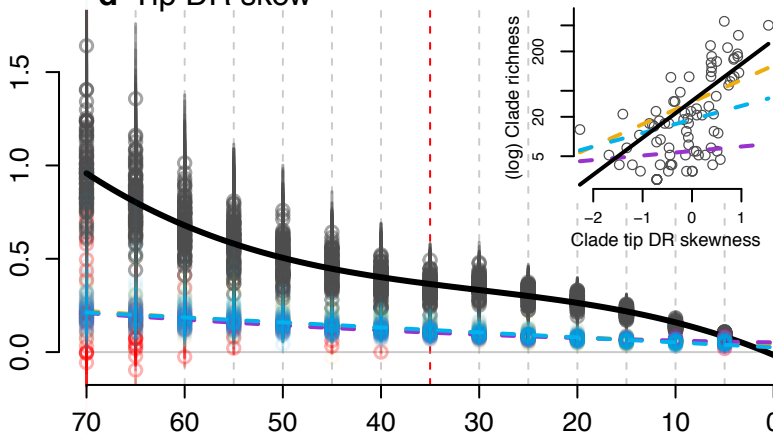

Million years before present (Ma)

Unique effects on (log) clade richness

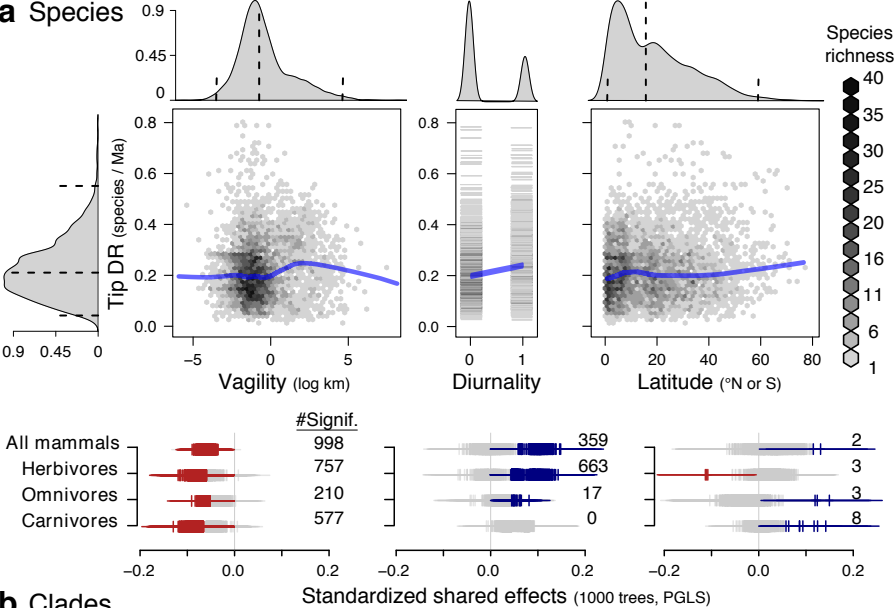

**b Clades**

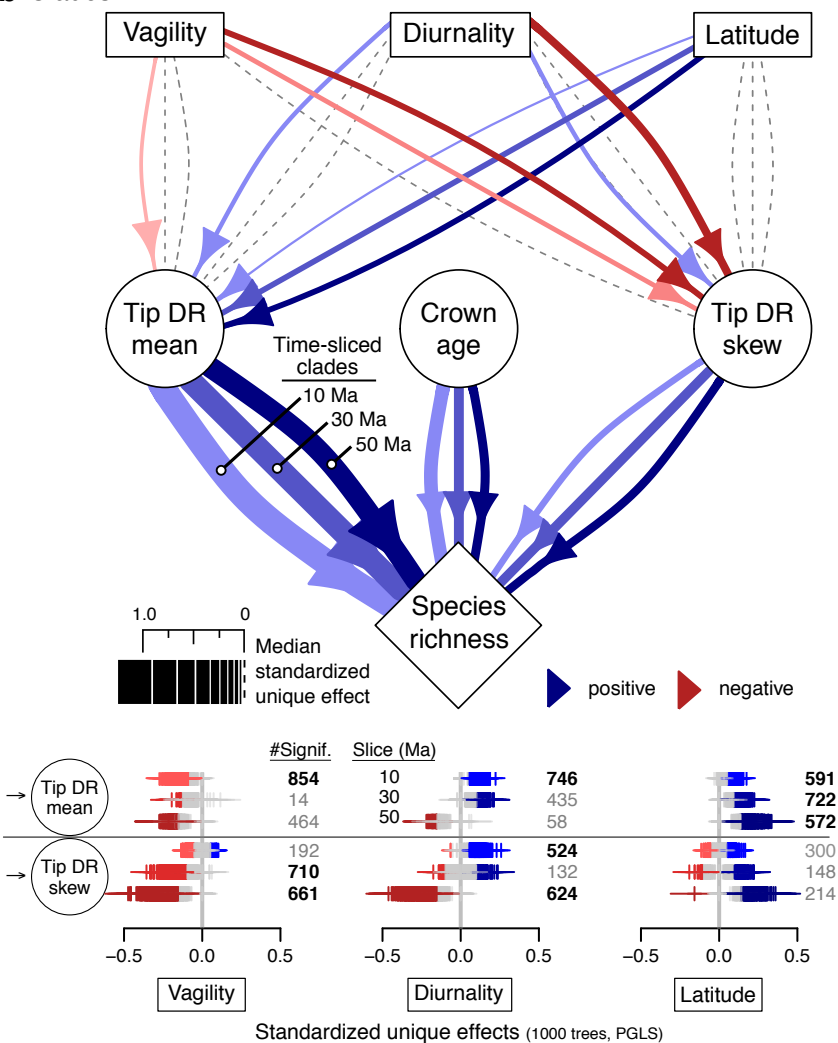

Source: https://www.biorxiv.org/content/10.1101/504803v2.full.pdf
