1 Letter

2 **Ecological causes of uneven speciation and species richness in mammals**

3 Short title: Ecology of speciation in mammals

4

5 **Nathan S. Upham<sup>1\*</sup>, Jacob A. Esselstyn<sup>2</sup>, and Walter Jetz<sup>3</sup>**

6

7 Author affiliations:

8 <sup>1</sup>Department of Ecology & Evolutionary Biology, Yale University, New Haven, CT 06511 USA,

9 [nathan.upham@yale.edu](mailto:nathan.upham@yale.edu). <sup>2</sup>Department of Biological Sciences and Museum of Natural Science,

10 Louisiana State University, Baton Rouge, LA 70803 USA, [esselstyn@lsu.edu](mailto:esselstyn@lsu.edu). <sup>3</sup>Department of

11 Ecology & Evolutionary Biology, Yale University, New Haven, CT 06511 USA,

12 [walter.jetz@yale.edu](mailto:walter.jetz@yale.edu).

13

14 \*Corresponding: 165 Prospect St., OML 122, New Haven, CT 06511 [nathan.upham@yale.edu](mailto:nathan.upham@yale.edu).

15

16 **Statement of authorship:** NSU and WJ conceived the study; NSU and JAE collected and  
17 curated the data; NSU performed all analyses and wrote the first draft of the manuscript, with  
18 contributions to revisions from all co-authors.

19 **Data and material availability:** All data and code is available in the manuscript and after  
20 publication on Dryad (also to be available at [github.com/n8upham/](https://github.com/n8upham/)).

21

22 **Keywords:** Phylogenetics, macroevolution, trait-associated diversification, dispersal, latitude,  
23 diel activity; **Length:** abstract 172 words; main text 4,710 words; 110 references; 5 figures.

24 **ABSTRACT**

25           Biodiversity is distributed unevenly from the poles to the equator, and among branches of  
26 the tree of life, yet how those enigmatic patterns are related is unclear. We investigated global  
27 speciation-rate variation across crown Mammalia using a novel time-scaled phylogeny ( $N=5,911$   
28 species, ~70% with DNA), finding that trait- and latitude-associated speciation has caused  
29 uneven species richness among groups. We identify 24 branch-specific shifts in net  
30 diversification rates linked to ecological traits. Using time-slices to define clades, we show that  
31 speciation rates are a stronger predictor of clade richness than age. Speciation is slower in  
32 tropical than extra-tropical lineages, but only at the level of clades not species tips, consistent  
33 with fossil evidence that the latitudinal diversity gradient may be a relatively young phenomenon  
34 in mammals. In contrast, species tip rates are fastest in mammals that are low dispersal or  
35 diurnal, consistent with models of ephemeral speciation and ecological opportunity, respectively.  
36 These findings juxtapose nested levels of diversification, suggesting a central role of species  
37 turnover gradients in generating uneven patterns of modern biodiversity.

38

## 39 INTRODUCTION

40 Biological diversity is concentrated at the equator more than the poles, and in some  
41 evolutionary lineages more than others. Yet whether these organic phenomena are causally  
42 connected is an open question. The latitudinal diversity gradient is generally attributed to tropical  
43 biomes being stable, productive, and old (1–5), but there is less consensus regarding why species  
44 richness is distributed unevenly across the tree of life. Phylogenetic tree shape was first  
45 characterized taxonomically (6) and later formalized under the concept of tree imbalance or  
46 unevenness (7). To arise, more speciose clades must have been derived from faster rates of net  
47 diversification (speciation – extinction), older ages (earlier divergences), or both. However, the  
48 relative contribution of clade rates and ages to species richness is widely disputed (e.g., (8–11)).  
49 Similarly controversial are the causes of diversification-rate variation in real phylogenies,  
50 whether due to stochasticity, determinism via ecological factors or time, or artifacts from how we  
51 reconstruct evolutionary history (12–23). Latitude might determine the rates at which new  
52 species originate and persist or go extinct (2, 3, 24–26), but so too might species' intrinsic traits  
53 (27), some of which are correlated with latitude (e.g., (28)). For mammals and other tetrapods,  
54 the Cretaceous-Paleogene (K-Pg) bolide impact is linked to the selective extinction of major  
55 lineages (29, 30), adding the wrinkle of historical contingency to how surviving lineages  
56 diversified in response (31–33). Thus, understanding the processes underpinning uneven species  
57 richness requires connecting levels of indirect (e.g., eco-geographic) and direct (e.g., rates, ages)  
58 causes to tease apart their joint influences upon different radiations.

59 The last ~180-million-years of crown mammalian evolution has resulted in ~6000 living  
60 species (34, 35), which collectively inhabit nearly all terrestrial biomes plus the open oceans, and  
61 thousands of preserved ancestors described as fossil taxa (36–38). Within this context, similarly

62 aged clades in the mammal tree range from mega-diverse rodents (~2500 living species) and bats  
63 (~1300 species) to species-poor groups like treeshrews (20 species) and pangolins (8 species; all  
64 four share stem ages of ~60-70 million years ago [Ma] (35, 39)). The early availability of a  
65 species-level ‘supertree’ phylogeny of mammals (now cited over 1,800 times; (40)) encouraged  
66 initial studies of macroevolutionary-rate covariates (e.g., (18, 22, 41, 42)). However, because that  
67 pioneering supertree was assembled from hundreds of overlapping source trees, over 50% of its  
68 nodes were initially unresolved and then simulated to obtain a bifurcating time-scaled phylogeny  
69 (40, 43). Timings of diversification from this supertree, along with two other mammal supertrees  
70 (11, 44), were consequently shown to have inflated precision relative to the large gaps in  
71 available fossil age and DNA sequence data (35).

72         Here, we draw upon a new time-calibrated phylogeny for global Mammalia built from a  
73 contiguous DNA supermatrix (31 genes by 4,098 species; completed to 5,911 modern species)  
74 and consisting of credible sets of 10,000 trees (35). We used these phylogenies, which jointly  
75 model uncertainty in topology and node ages, to better understand the temporal dynamics of  
76 mammalian diversification relative to the potentially causal effects of historical, organismal, and  
77 environmental factors. Our objectives were three-fold. First, we tested for tree-wide and branch-  
78 specific rate variation in relation to the Cretaceous-Paleogene (K-Pg) mass extinction event to  
79 explore whether predicted shifts in placental diversification rates (45) are recoverable across  
80 extant clades. Second, we used neutrally defined (time-slice based) clades to explore the relative  
81 roles of clade ages and speciation rates in explaining current-day species richness. Finally, we  
82 linked observed variation in speciation rates to its putative ecological causes, testing whether  
83 factors predicted to cause newly formed species to persist or go extinct are, in turn, causing the  
84 observed patterns of uneven species richness. Investigating deep-time rate shifts (e.g., relative to

85 the K-Pg or other factors) alongside the drivers of modern clade richness is intended to test for  
86 time-specific differences in the drivers of mammalian rate variation.

87       Among clades, we focus on three potential ecological causes of richness differences:  
88 species vagility, latitude, and diurnality. First, we tested whether low-vagility species have faster  
89 speciation than more dispersive species given their greater likelihood of forming peripheral  
90 isolates (46, 47). For this test, we developed an allopatric index of organismal vagility for all  
91 mammals (i.e., maximum natal dispersal distance; (48)). Vagility effects have never been  
92 assessed across all mammals, although evidence in birds using the hand-wing index supports an  
93 inverse vagility-to-speciation rate relationship (e.g., (49, 50)). Second, if unstable environments  
94 increase ephemeral speciation via greater species turnover (extinction / speciation (51)), then we  
95 expect the recent species-specific (i.e., ‘tip’) speciation rates of surviving lineages to be higher in  
96 temperate latitudes with greater climatic instability (25, 52). To our knowledge, the effects of  
97 latitude upon mammal tip rates have yet to be assessed, but clade-level comparisons have either  
98 been negative (53) or supported greater temperate than tropical turnover in some clades (24, 42,  
99 54). Lastly, we tested whether diurnality (daytime activity) has increased speciation rates relative  
100 to nocturnal clades, following recent evidence that all mammals were nocturnal until daytime  
101 niches evolved ~35 Ma (33, 55). A positive influence of diurnality on speciation rates has been  
102 found across major tetrapod lineages (56), and in primates specifically (57, 58), but has yet to be  
103 investigated at the species-level in all mammals (but see ancestral state reconstructions (55)). We  
104 are thus using species-level trait proxies to investigate scenarios of geographic, ephemeral, and  
105 adaptive modes of species diversification in mammals, respectively, and across the entire  
106 mammal tree of life to avoid ascertainment bias from selecting smaller clades (59).

107 Overall, our approach ties together among-clade variation in rates, ages, richness, and  
108 traits in a multivariate causal framework (phylogenetic path analysis (60)). By jointly assessing  
109 the causal contributions of ecological factors to the inferred tempo of mammalian lineage  
110 diversification, we shed new light on their relative importance to generating uneven species  
111 richness patterns. We find that vagility and diurnality are greater causes of recent speciation-rate  
112 variation than latitude, which effects rates deeper in the tree. Rate variation, in turn, contributes  
113 more to uneven species richness than differences in clade age.

114

## 115 **RESULTS AND DISCUSSION**

### 116 **Tree-wide lineage diversification relative to the K-Pg event.**

117 The Mammalia tree shows substantial unevenness in species richness across major named  
118 clades (Fig 1a). We first evaluated evidence for whether early placentals diverged before, after,  
119 or during the K-Pg event, known as the short fuse, long fuse, and explosive models, respectively  
120 (45, 61). The first four placental divergences unambiguously preceded the K-Pg (Fig. 2a; filled  
121 circles), followed by the next 21 divergences with CIs that overlap it (Fig. 2a–b). Therefore, we  
122 detect a Cretaceous “fuse” of ~25-Ma between the radiation of crown Placentalia and nine of 18  
123 crown orders (Fig. 2b), in line with some estimates (39, 62), but longer than others (e.g., (40)).

124 Modeling branch-specific rates across the tree shows a qualitative pulse in both  
125 speciation and extinction near the K-Pg (Fig. 2c) that matches concurrent fossil evidence for  
126 increases in origination and extinction (Fig. 2d; synthesized from the Paleobiology Database  
127 (37)). However, we find mixed results in formal tests of tree-wide shifts in the 5-Ma following  
128 the K-Pg, with TreePar (41) showing a clear signal of increased net diversification rates that is  
129 absent in CoMET analyses (63) ((Fig. S5-S6); the latter model allows for time-varying

130 diversification rates while the former does not). Based on the patterns reported in fossil  
131 eutherians (45, 64), a pulse of lineage turnover following the K-Pg is expected due to selective  
132 extinction and recovery of surviving mammal lineages (29, 31). Thus, this fossil-calibrated  
133 molecular phylogeny of mammals (35) is capable of recovering dynamics evident from the fossil  
134 record alone, albeit as dependent upon assumptions of different tree-wide birth-death models.

135

### 136 **Branch-specific rate shifts relative to time and traits.**

137 We recover shifts in net diversification rates associated with 24 consistent nodes in the  
138 mammal tree (Fig. 1a, 2c, e; shifts are present in  $\geq 50\%$  of maximum shift credibility trees using  
139 BAMM (65), see *Supplementary Materials* Fig. S7, Table S1). The earliest rate shift occurs in  
140 either crown Placentalia (mean of 1.1x higher over separate BAMM runs, as compared to the  
141 median background rate of 0.138 species/lineage/Ma) or Boreoeutheria (1.6x, node C in Fig. 1a).  
142 These shifts involve 18 different lineages, 15 of which are consistent increases. The only  
143 consistent rate decrease was in the strepsirrhine primates (lemurs, lorises, and galagos; node O).  
144 Two other shifts are alternately up or down, depending on the tree sampled (nodes H, P; Fig. 1a).  
145 This result compares to 27 rate-shifted clades detected on the original mammal supertree using  
146 an earlier method (15 increasing and 12 decreasing (18)—but note caveats about the  
147 identifiability of downshifts (66)). Overall, rate increases nearer the present are higher, with a  
148 2.2x mean in the Miocene versus 1.3x in each the Oligocene and Eocene (Fig. 2c;  $df=2$ ,  $F=7.772$ ,  
149  $P=0.003$ ). This result is consistent with the expectation for extinctions deeper in the tree to have  
150 reduced our ability to quantify more ancient shifts (65, 67), as well as fossil and molecular  
151 evidence that younger clades tend to have faster rates of diversification (20).

152 At first glance, species in rate-shifted clades have dissimilar traits of vagility, diurnality,  
153 and latitudinal extent (Fig. 1a-b). However, several consistent patterns emerge. On a visual basis,  
154 related clades of rodents show a conspicuous latitudinal pattern of alternating south-north-south  
155 endemism that may relate to biogeographic incumbency effects previously reported (e.g., (68)).  
156 Similarly, the rate shifts present in Cetacea and Carnivora (nodes F and D; Fig. 1a) are associated  
157 with high vagility and latitudinal extents, while simian primates (node N) are nearly exclusively  
158 tropical and diurnal (Fig. 1b). Strikingly, the two largest rate increases (4.0x and 3.2x) occurred  
159 in lineages with disparate life modes but similar propensities for geographic isolation: the  
160 fossorial tuco-tucos of South America (*Ctenomys*, node Q), and the Indo-Pacific flying foxes  
161 (*Pteropus*, node J; Fig. 1a). Thus, small burrowers and large flyers both show similar signatures  
162 of recent and rapid speciation under conditions of insularity, although in subterranean and  
163 oceanic realms, respectively. Ecologically selective processes appear to be involved in fostering  
164 major mammalian radiations, but are these trait associations idiosyncratic or deterministic?

165 We next investigated trait-dependent speciation on a tree-wide basis, aiming to look for  
166 common ecological causes of rate variation. These tests uncovered that high vagility is  
167 marginally associated with novel rate regimes (STRAPP (69) one-tailed test,  $P = 0.08$ ), which is  
168 contrary to the inverse vagility-to-speciation relationship we expected (46, 47). However, these  
169 tests are complicated by the fact that many high-vagility lineages are also diurnal, and diurnality  
170 is clearly associated with shifts to higher speciation-rate regimes ( $P = 0.027$ ; Fig. S8). For  
171 example, we find diurnality-associated rate shifts in clades of primates, carnivorans, cows, and  
172 whales (shifts N, D-F, and Q; Fig. 1a) that also contain a majority of species with  $>1$  km natal  
173 dispersal distance (Fig. 1b). Therefore, these findings highlight the need to jointly consider (i.e.,



174 in the same model) the relative contributions of vagility, latitude, and diurnality to understand  
175 their effects upon rate heterogeneity in mammalian clades.

176

177 **Named clade rate variation.**

178 Beyond searching for rate-shifted clades, we also test the five most speciose placental  
179 orders for signatures of diversification-rate variation (Fig. 2e-f). Comparing the fit of models of  
180 rate-variable processes through time (RV, exponential or linear; (70)) versus rate-constant ones  
181 (RC, single rates of birth or death), we find greater fits to RV models in five of the 12 named  
182 subclades examined (Fig. 2f; Table S2). The mouse-related clade of rodents (clade 20 in Figs. 1,  
183 2f) has a branching pattern best fit by RV processes in all 100 trees examined, as expected from  
184 the seven branch-specific rate shifts already uncovered in that clade (nodes R-X in Figs. 1, 2).  
185 Shrews, catarrhine primates, and the cow- and whale-related clades of artiodactyls join mice in  
186 showing greater RV fits than expected from RC simulation (clades 6, 15, 10, and 11; Fig. 2f).  
187 Overall, these named clade results are consistent with previous evidence (e.g., among mammal  
188 families (21)) that lineage diversification rates have been non-constant through time.

189 In theory, considerably more fossil evidence might be required for the birth-death models  
190 evaluated so far to be identifiable (71). This word of caution is particularly relevant for groups  
191 like horses and pigs (*Perissodactyla* (72)), in which we know that periods of diversity decline  
192 have been substantial (see (73) for general comparison of BAMM and RPANDA model  
193 performance). Nevertheless, clade-specific fossil and molecular evidence supports our assertion  
194 that ancestral whales and dolphins entered a novel macroevolutionary regime, including selection  
195 toward larger body sizes (65, 69, 70, 74). Bats, on the other hand, display an inconsistent fit to  
196 RV models of diversification (clades 12-13, Fig. 2f), and an inconsistent number of rate shifts

197 between our study (six, nodes G-L, Fig. 1a) and a previous one (two, nodes H and J; (75)). We  
198 suggest that high levels of topological uncertainty, which is arguably greater in bats than other  
199 orders (76), is contributing to the equivocal modeling of RC, RV, and branch-specific shift  
200 processes across credible tree sets for bats (Table S2).

201 As an alternative, non-model-based test of within-clade rate variation, we use clade-wide  
202 distributions of tip-level speciation rates as assessed using the tip DR metric (77) (Fig. 2f). Tip  
203 rates carry the benefit of estimating diversification dynamics at the instantaneous present, and  
204 thereby overcome the aforementioned concerns regarding the impact of past extinctions on  
205 model identifiability (71, 73, 78, 79). Broadly, we recognize substantial heterogeneity in tip  
206 speciation rates across the mammal tree, sometimes with a few high-tip-rate species nested  
207 together with lower-rate species (Fig. 1a), resulting in long right-side tails in the tip-rate  
208 distributions (positive skew, e.g., bat and rodent clades 12 and 18; Fig. 1a, 2f). We propose that  
209 tip rate skew measures aspects of within-clade speciation-rate variation that is otherwise  
210 uncaptured by fitting *a priori* models of the diversification process (Table S3), and thus offers a  
211 distinct predictor of among-clade variation in species richness.

212

### 213 **Time-slice clade richness relative to ages and rates.**

214 The relative importance of clade ages (time) versus rates of speciation and extinction  
215 (whether stochastic or ecologically deterministic) as an explanation of extant diversity levels is  
216 widely debated (8–12, 16, 21, 80). Original claims that uneven trees are random outcomes of  
217 constant-rate diversification (e.g., (81)) have been refuted (10, 13, 17). However, past efforts to  
218 separate these hypotheses have focused on named clades (e.g., (10, 21)), which are biased by  
219 subjective delineation and often vast age differences (mammal families range 3.8–59.0 Ma in

220 mean crown ages; (35)). To avoid problems associated with subjective clade definitions, we  
221 sliced phylogenies at five-million-year intervals and took the tipward clades as objective units  
222 for analysis (Fig. 3). Time-sliced clades thus account for the ‘pull of the present’ in modern trees  
223 (67) by analyzing successive levels of rootward covariance among clade-level summaries of  
224 crown age, species richness, tip rate harmonic mean and skew, and the arithmetic (or geometric)  
225 mean of species ecological traits. If time-constant rates predominate (11, 12, 16), crown ages will  
226 explain the most among-clade variation in species richness. In contrast, if rate variation is strong,  
227 as we already recognized for some nodes and named clades (Fig. 2) and expect from varying  
228 ecological regimes (18, 22, 23), diversification rates will have the greater explanatory power.

229 We find that the clade harmonic mean of tip speciation rates explains most of the  
230 variation in species richness across time-sliced clades (Fig. 4, multivariate PGLS). Clade age and  
231 richness are positively correlated (Fig. 4a)—yet clade tip rate mean has stronger effects on  
232 richness than expected from simulated birth-death trees containing only stochastic rate variation  
233 (Fig. 4b). Clade tip rate skew is also significant, especially so at deeper time slices (Fig. 4c),  
234 confirming that single speed-ups in diversification within a clade (e.g., due to a rate shift in one  
235 lineage) can drive much of its overall species richness today. These analyses are robust to the  
236 influence of species that are missing DNA sequences and imputed (see Fig. S10, also for  
237 univariate and taxon-based results). Our findings thus support arguments that ‘ecology’ (broadly  
238 defined to include any non-temporal factor that alters macroevolutionary-rate processes,  
239 including sexual selection and geographic factors) is a greater cause of species richness variation  
240 than time (21–23). However, variation in both rate and age clearly contribute to observed  
241 richness (adjusted- $R^2$ : 0.88 full model versus 0.74 with tip rate mean only and 0.26 with crown  
242 age only, means of 100-tree PGLS among 35-Ma clades). Jointly analyzing richness

243 determinants in time-sliced clades offers an objective way to assess age and rate effects that, in  
244 turn, raises questions about which ecological factors are driving that rate variation.

245

### 246 **Linking uneven rate variation to ecological factors.**

247 We performed phylogenetic path analysis (60) to assess the hypothesized effects of  
248 species vagility (46, 47), latitude (24, 25), and diurnality (33) upon the joint, yet unequal,  
249 contributions of rates and ages to extant species richness variation (Fig. 5, *Methods*, Fig. S4).  
250 Here, the time-sliced clades allow us to distinguish trait-rate dynamics that are localized near the  
251 species level (if traits drive species turnover (51), or if they evolved very recently) from those  
252 that occur among clades deeper in the tree (if traits evolved anciently and the lineages persisted).  
253 Our assembly of species-level traits across Mammalia (Fig. 1b) enables us to directly pass  
254 information to clade-level averages, thereby summarizing the ecological ‘essence’ of that clade  
255 for a given trait. However, we note that other statistical moments (e.g., trait variance or skew)  
256 may prove useful for future study.

257 At the species level, we find that low-vagility mammals have higher tip speciation rates,  
258 especially in herbivores and carnivores (Fig. 5a; ecological trait ~ rate PGLS (82)). Effects of  
259 vagility on clade tip rate mean in 10-Ma clades are weakened at deeper time slices, where they  
260 are instead recorded on tip rate skew (Fig. 5b). We interpret these short-lived effects of vagility  
261 on speciation rates as consistent with expectations that incipient species are produced at a high  
262 rate, but are ephemeral (51), subject to high species turnover. Under this scenario, speciation  
263 rates are roughly constant, but low-vagility lineages have gone extinct at a faster rate than high-  
264 vagility forms, presumably due to the stochastic effects of small geographic range size in nascent  
265 species (47, 83). In summary, we hypothesize that turnover-driven speciation—i.e., speciation

266 rates that are high because extinction rates are high, and a lineage is still observed—is causing  
267 the inverse effects of vagility upon tip speciation rates we observe in the mammal tree.

268 Our interpretation argues for an approximately 10-million-year ‘threshold’ whereby low-  
269 vagility lineages must lower their extinction risk (e.g., find an adaptive zone or evolve greater  
270 vagility; (84, 85)) or else vanish. Alternatively, the influence of vagility on mammal  
271 diversification might be non-linear as hypothesized in birds (e.g., humped (46) or sigmoidal  
272 (50)), in which case our results among shallow clades and tip species may only be capturing one  
273 side of the vagility-to-rate relationship. We concede that our allometric vagility index is a rough  
274 proxy for dispersal ability, particularly given the potential for island effects in the nearly 20% of  
275 living mammals that are endemic to islands (86). Similarly, the vagility index does not explicitly  
276 account for the flying abilities of bats, which differ substantially by wing morphology (87).  
277 Nevertheless, the described patterns are robust to multiple sensitivity tests (including the  
278 exclusion of bats and island endemics; (Fig. S13-S14)), and thus are deemed to convey the  
279 macroevolutionary outcome of historical gene flow or isolation among populations of mammals.

280 To test the causal role of environmental stability in the generation of mammalian tree  
281 shape (3, 25, 52), we next evaluated how a climatic proxy—latitudinal centroid distance from the  
282 equator—influences speciation rates. Contrary to the expectations of climatic instability driving  
283 recent, high rates of speciation at temperate latitudes (24, 25, 52), we find no effect of absolute  
284 latitude on tip-level speciation (Fig. 5a). Instead, strong positive associations with latitude only  
285 arise among clades at deeper time slices, and without any corresponding effects on clade tip rate  
286 skew (Fig. 5b). These results compare to similarly absent latitude-to-tip rate effects in the  
287 species-level phylogeny of birds ((77, 88); but see suboscines (89)). For both birds and  
288 mammals, New World sister species show higher turnover rates at temperate than tropical

289 latitudes (24, 52); however, reliance on the mitochondrial DNA clock renders these results less  
290 conclusive for mammals than birds given their more pronounced life-history effects (90). Other  
291 mammal studies have yielded inconsistent findings with a variety of methods, including: (i)  
292 higher subspecies counts in harsher temperate environments ((54); but note the opposite pattern  
293 in birds (91)); (ii) no latitude-to-rate effects at the genus level (53), using genus ages from the  
294 Bininda-Emonds et al. (40) supertree of mammals; and (iii) greater rates of temperate extinction  
295 and tropical speciation on a Mammalia-wide basis (42), using a modified version of the same  
296 supertree. Thus, our finding that temperate clades of mammals have higher tip rates than tropical  
297 clades (harmonic mean of species values at 10-, 30-, and 50-Ma time-sliced clades) sheds new  
298 light on what, to date, has been a murky understanding of how macroevolutionary rates have  
299 influenced the latitudinal diversity gradient.

300 We hypothesize that high rates of temperate extinction during the Plio-Pleistocene, a  
301 period of harsh environmental changes starting ~5 Ma (92), may have erased the modern portion  
302 of the latitudinal effect that otherwise would be recorded in species' present-day tip rates. Under  
303 this scenario, finding clade-level signatures of faster temperate speciation (as we did) is still  
304 expected as long as temperate lineages were not fully extirpated during these climatic  
305 oscillations, perhaps as persisting in glacial refugia (93). Key to understanding this result is that  
306 the latitude-to-rate signature among, e.g., 30-Ma clades reflects processes occurring *more*  
307 *recently* than 30 Ma, since we are examining clade-level summaries of branching rates leading to  
308 each species' instantaneous present. Thus, we are proposing that intensified Pliocene rates of  
309 temperate extinction initiated two canonical patterns, at least in mammals if not other taxa: (i) the  
310 inverse latitudinal gradient of clade-level speciation rates, as viewed retrospectively on an extant  
311 phylogeny; and as a result, (ii) the latitudinal diversity gradient. This hypothesis is supported by

312 the North American fossil record (the most complete paleogeographic sampling of mammals), in  
313 which richness and latitude are not strongly correlated until ~4 Ma (94), as well as evidence from  
314 fossil bivalves that Pliocene extinctions strengthened the latitudinal diversity gradient (95).  
315 Overall, we contend that the traditionally invoked tropical ‘cradle’ (higher speciation) and  
316 ‘museum’ (lower extinction (3)) should instead re-focus upon the *turnover ratio* of those  
317 processes. Testing whether species lineages have been ‘cycled’ faster (i.e., shorter durations)  
318 outside than inside the tropics is a prediction in need of greater paleo-to-neontological synthesis.

319       Lastly, we queried the effect of diurnal diel activity, a core behavioral trait thought of as a  
320 temporal niche innovation (33). We find that apparently independent origins of diurnality since  
321 the late Eocene (~35 Ma (33, 55)) are associated with faster speciation, both at the present (Fig.  
322 5a) and among time-sliced clades at 10 Ma (Fig. 5b). These findings complement the signature  
323 of greater diurnal activity on rate-shifted clades (Fig. S8), as well as place previous findings of  
324 rapid diversification in diurnal lineages of primates (57, 58, 96) and whales (70) in a broader  
325 context. We suggest that inverse effects of diurnality on tip rate skew at deeper time slices (Fig.  
326 5b) are misleading given the evolution of daytime activity ~35 Ma, well after a ‘nocturnal  
327 bottleneck’ among K-Pg-surviving mammals (33, 55). This bottleneck has been described at  
328 broader phylogenetic scales across major extant lineages of tetrapods (family-level sampling for  
329 mammals (56)), although fossil evidence suggests that daytime activity also evolved in the  
330 extinct sister lineages to mammals (non-mammalian synapsids (97)). The coordinated eco-  
331 physiological changes required to evolve diurnality (e.g., eye pigments and corneal size (33))  
332 have presumably carried with them fitness benefits from access to novel resources in the daytime  
333 niche. Thus, diurnality may rightly be viewed as an adaptative innovation in mammals, and one  
334 that appears to have induced macroevolutionary rate changes.

335 To explain faster speciation in diurnal clades and species, we posit that greater daytime  
336 activity is an example of a trait that has decreased extinction rates via competitive release (i.e.,  
337 an ‘ecological opportunity’; (84, 98)). In this scenario, evolving diurnality has led to differential  
338 lineage persistence (i.e., low rates of species turnover = low extinction / high or moderate  
339 speciation) relative to nocturnality because novel niche resources have presumably improved  
340 organismal fitness (33, 84). This hypothesis implies that persistence-driven speciation—i.e.,  
341 speciation rates that appear high because extinction rates are reduced—underlies the diurnal rate  
342 signature, in contrast to the turnover-driven speciation we suggest is associated with low-vagility  
343 and high-latitude lineages. Alternatively, the more classical narrative of ‘key innovation’  
344 spurring diversification (84) would suggest that diurnal lineages have increased speciation rates  
345 (with no change in extinction) due to specializing on resources within the relatively ‘open’  
346 diurnal ecospace. While we cannot rule out this speciation-only hypothesis, we find it less  
347 probable because the acquisition of diurnal behavior has likely evolved and persisted at least ten  
348 times in crown mammals (55). From diurnal primates and squirrels to elephant shrews, there  
349 seems to be no characteristic secondary axis of resource specialization that is common to these  
350 groups (e.g., diet or locomotor diversity); rather, allopatric speciation—and persistence of those  
351 lineages—is more likely the secondary driver of diurnal diversity (e.g., (99)) following the initial  
352 adaptation. Overall, we suggest that faster diurnal than nocturnal speciation in mammals is a  
353 signature of greater persistence (lower turnover) of lineages due to more ecological opportunity.

354

## 355 **CONCLUSION**

356 By taking an uncommonly broad view on the evolutionary history of Mammalia, from  
357 tree-wide to branch-specific to tip-level processes, the present study uncovers commonalities in



358 the ecological causes of uneven species diversification over geography as well as phylogeny.  
359 These general processes might have remained hidden had this study been motivated by  
360 publishable units and not global synthesis. Using an innovative time-slice approach to defining  
361 clades, we demonstrate that clade rates explain more of the variation in mammal species richness  
362 than do clade ages. Connecting those clades rates to both intrinsic (vagility, activity pattern) and  
363 extrinsic (latitude) characteristics of the component species, we then detect consistent ecological  
364 signatures at nested levels of the mammal phylogeny.

365 Overall, we hypothesize that two main processes are at work. First, we identify signatures  
366 of turnover-driven speciation at shallow levels of the tree due to greater geographic isolation  
367 among low-vagility species, and among deeper clades due to the survival of temperate lineages  
368 in extratropical climates. We provide phylogenetic evidence supporting the notion that the  
369 latitudinal diversity gradient is in fact a relatively young phenomenon in mammals, perhaps  
370 originating or steepening during the Pliocene as the fossil record suggests (94). Second, we  
371 hypothesize that persistence-driven speciation is occurring in diurnal lineages due to lower  
372 extinction rates following access to new daytime niches and subsequent release from nocturnal  
373 competitors. In this case, diurnality is an example of an adaptive innovation in mammals that is  
374 presumably associated with greater ecological opportunity. Traversing from the first to second  
375 macroevolutionary mode may be possible if otherwise ephemeral incipient species can enter  
376 novel regimes of lower extinction risk, either via niche evolution or extrinsic opportunity (84,  
377 98), to then differentially persist through time.

378 In summary, our study shows that coupling two ideas—that new species are formed  
379 frequently but rarely persist (51), and extinction risk is related to species-level traits (27)—helps  
380 to connect within-species dynamics of dispersal, gene flow, and niche evolution with

381 macroevolutionary rates. We logically reason that axes of low-to-high vagility and day-to-night  
382 activity are affecting extinction rates in respectively opposite directions (i.e., high extinction and  
383 turnover versus low extinction and turnover). However, the lack of direct extinction-rate  
384 estimates is a clear shortcoming of this argument that can only be addressed by more fully  
385 leveraging the mammal fossil record. Future tests that develop direct skeletal or remotely sensed  
386 measurements of mammalian vagility (as opposed to the indirect index used here), along with  
387 cranial correlates of diurnal vision (e.g., (97)), will be valuable for assessing whether the relative  
388 frequency of turnover- and persistence-driven speciation has changed from fossil to modern  
389 ecosystems. Efforts to connect evolutionary levels from individual organisms to speciose clades  
390 appear the most promising for comprehending uneven species richness in the tree of life.

391

## 392 **METHODS**

393 **Mammalian phylogeny and species trait data.** We leveraged the recently constructed  
394 species-level mammal trees of Upham et al. (35) to conduct all analyses. Briefly, these  
395 phylogenies include 5,804 extant and 107 recently extinct species in credible sets of 10,000 trees.  
396 They are built using a ‘backbone-and-patch’ framework that used two stages of Bayesian  
397 inference to integrate age and topological uncertainty, and incorporate 1,813 DNA-lacking  
398 species using probabilistic constraints (available at [vertlife.org/phylosubsets](http://vertlife.org/phylosubsets)). We compared  
399 credible sets of trees built using node-dated backbones (17 fossil calibrations) and tip-dated  
400 backbones (matrix of modern and Mesozoic mammals), as well as taxonomically completed  
401 trees (5,911 species) versus trees of DNA-only species ( $N = 4,098$ ) without topology constraints.

402 Our workflow for gathering trait data involved (i) unifying multiple trait taxonomies  
403 (e.g., EltonTraits v1.0 (100), PanTHERIA (101)) to our phylogeny’s master taxonomy; and (ii)  
404 interpolating home range area and vagility to the species level using known allometric

405 relationships in mammals (Fig. S2). Vagility was calculated as the maximum natal dispersal  
406 distance per individual (km) and interpolated for each species following our updated version of  
407 Whitmee and Orme's (48) best-fit equation, which applies species means of body mass, home  
408 range, and geographic range (Fig. S3). Note that our vagility index does not account for  
409 locomotor abilities (e.g., flying or arboreality), but rather captures aspects of space use that scale  
410 allometrically across mammals.

411 **Tip-level speciation rates.** We calculated per-species estimates of expected pure-birth  
412 diversification rates for the instantaneous present moment (tips of the tree) using the inverse of  
413 the equal splits measure (77, 102). This metric has been called 'tip-level diversification rate' (tip  
414 DR) because it measures recent diversification processes among extant species (103). However,  
415 to avoid confusion with 'net diversification', for which tip DR is misleading when extinction is  
416 very high (relative extinction  $>0.8$  (78)), we here refer to tip DR as a tip-level speciation rate  
417 metric. At the tip level, we show that tip DR is tightly associated with model-based estimators of  
418 speciation and net diversification rates in our trees (Fig. S1a). At the clade-level, we measure  
419 'clade tip speciation mean' as the harmonic mean of tip DR among species, which is known to  
420 converge to the maximum likelihood estimator of pure-birth diversification rate in clades with  
421  $>10$  species (77, 102). We show that clade tip DR mean indeed best approximates pure-birth  
422 clade rates for time-sliced clades in our mammal trees ( $R^2$ :  $\sim 0.7$  versus  $\sim 0.5$  for birth-death  
423 speciation and net diversification rates; Fig. S1b).

424 **Branch-specific and tree-wide rate shifts.** We performed searches for  
425 macroevolutionary shifts using BAMM v2.5 (65), a reversible-jump algorithm for sampling  
426 birth-death rate regimes without a prior hypothesis. We evaluated the number and location of  
427 rate shifts on 10 trees from the node-dated sample of complete mammal trees. We summarized

428 across the most likely shifts per tree—called maximum shift credibility (MSC) sets (Fig. S7)—  
429 using the ratio of the mean net diversification rate of all branches inside the shifted clade (clade  
430 rate) and outside that clade (background rate) to calculate the rate shift magnitude and direction  
431 for each MSC set (Table S1). For tree-wide rate shifts, we compared results from TreePar (41)  
432 and CoMET (63) (see details in Fig. S5-S6).

433 **Comparisons with fossil genus diversification.** To assess the congruence of our  
434 molecular phylogeny-based rate estimates with rates estimated from the fossil record, we  
435 analyzed Mammalia fossil occurrence data from the Paleobiology Database (37). Grouping by  
436 genus after excluding ichnotaxa and uncertain genera, we recovered 71,928 occurrences of 5300  
437 genera, which we then binned in 10-Ma intervals (taxa spanning boundaries go in both bins) and  
438 used shareholder quorum subsampling (SQS (104); quorum size: 0.5) to maximize the  
439 uniformity of coverage. We then calculated corresponding origination and extinction rates per  
440 stage using the per-capita rate method (105).

441 **Likelihood testing for models of diversification.** We analyzed the branching times of  
442 27 named subclades (11 orders and 16 suborders) that contained  $\geq 25$  species. For each subclade,  
443 we tested 10 models developed by Morlon et al. (70): two rate-constant (RC) models, constant  
444 pure-birth and birth-death; and eight rate-variable (RV) models, with exponentially and linearly  
445 time-varying rates. We fit models for 100 trees of the empirical subclades and their matching  
446 RC-simulated trees (null models, simulated under the empirical extinction fractions of  $\sim \varepsilon=0.65$   
447 over 100 trees using the “pbtree” function in phytools (106)). Subtracting AICc scores of the  
448 best-fitting RC and RV models provided the  $\Delta AIC_{RC-RV}$  test statistic (107) per tree and subclade  
449 for comparison to the simulated null distribution ( $\alpha=0.05$ ; see Table S2).

450           **Time-sliced clades and clade-level tests of species richness variation.** To objectively  
451 define clades, we arbitrarily drew lines (referred to as “time slices”) at 5-Ma intervals and took  
452 the resulting *tipward* (all the way to the extant tip) monophyletic clades as non-nested units of  
453 analysis. The *rootward* relationships of those clades (the “rootward backbone”) was retained for  
454 each interval, giving the expected covariance structure among clades when performing  
455 phylogenetic generalized least squares (PGLS) analyses (see Fig. 3 for illustration). We used the  
456 “treeSlice” function in phytools to construct clade sets across Mammalia trees and the three sets  
457 of RC simulations, empirical ( $\epsilon=0.65$ ), low ( $\epsilon=0.2$ ), and high ( $\epsilon=0.8$ ), also comparing our results  
458 to analyses on traditional taxon-based clades (genera, families, and orders; Fig. S10-S12). All  
459 PGLS was performed excluding extinct species, using Pagel’s “lambda” transformation in  
460 phylolm (optimized for large trees (108)), and repeating the analysis across 100 or 1000 trees.  
461 We also performed multivariate analyses including percent of DNA-sampled species per clade to  
462 test whether our results are unaffected by imputing DNA-missing species (Fig. S10).

463           **Tip-level tests of speciation-rate correlates.** To examine correlative structures  
464 underlying observed tip-rate variation, we performed tip-level PGLS analyses between species’  
465 ecological traits and tip DR values across 1000 trees, focusing on a 5675-species data set that  
466 excluded all extinct ( $n=107$ ) and marine ( $n=129$ ) species. We followed Freckleton et al. (82) in  
467 using trait ~ rate models in our tip-level PGLS analyses to avoid identical residuals in the  
468 dependent variable (i.e., sister species have identical tip DR values, which otherwise violates the  
469 assumed within-variable data independence in bivariate normal distributions). The trait ~ rate  
470 approach was previously applied using tip DR in univariate contexts (109) (see Fig. S13-S14 for  
471 sensitivity tests).

472           **Clade-level tests of speciation-rate correlates.** At the clade level, univariate PGLS was  
473 performed typically (rate ~ trait models), since clade tip DR mean gave independent values to  
474 sister clades. These analyses were conducted on 1000 trees by analogy with those previous,  
475 except that per-clade trait summaries were standardized predictors (mean centered, standard  
476 deviation scaled) using geometric means for vagility and arithmetic means otherwise. We also  
477 performed tests for trait-dependent speciation using rate-shifted clades identified in BAMM runs  
478 on 10 mammal trees (STRAPP (69) method), which corrects for phylogenetic pseudoreplication  
479 similar to PGLS except instead via the covariance structure among rate regimes (see Fig. S8).

480           **Phylogenetic path analyses.** We performed path analysis aiming to fully resolve  
481 correlational structures and thereby translate from the language of statistical association to  
482 causality. For phylogenetic path analyses, we used PGLS to test statements of conditional  
483 independence (60) across 27 pre-selected path models (Fig. S4). For each tree and clade set, we  
484 used “phylopath” (110) to analyze models and perform conditional model averaging. Time-sliced  
485 clades at 10-, 30-, and 50-Ma intervals were analyzed and compared to analogous results using  
486 taxon-based clades (Fig. S12; see *Supplementary Information* for further details).

487

488           **Acknowledgments:** We thank I. Quintero, M. Landis, D. Schluter, A. Mooers, A. Pyron, G.  
489 Thomas, D. Greenberg, S. Upham and E. Florsheim for conceptual discussions that improved  
490 this study; B. Patterson, K. Rowe, J. Brown, T. Colston, T. Peterson, D. Field, T. Stewart, J.  
491 Davies, and three anonymous reviewers for comments on earlier drafts; and M. Koo, A.  
492 Ranipeta, and J. Hart for database help. Artwork from phylopic.org and open source fonts.

493           **Funding:** The NSF VertLife Terrestrial grant to W.J. and J.E. (DEB 1441737 and 1441634) and  
494 NSF grant DBI-1262600 to W.J. supported this work. **Competing interests:** None.

## 495 References

- 496 1. P. V. A. Fine, R. H. Ree, Evidence for a Time-Integrated Species-Area Effect on the  
497 Latitudinal Gradient in Tree Diversity. *Am. Nat.* **168**, 796–804 (2006).
- 498 2. D. Jablonski, K. Roy, J. W. Valentine, Out of the Tropics: Evolutionary dynamics of the  
499 latitudinal diversity gradient. *Science* **314**, 102–106 (2006).
- 500 3. G. G. Mittelbach, *et al.*, Evolution and the latitudinal diversity gradient: speciation,  
501 extinction and biogeography. *Ecol. Lett.* **10**, 315–331 (2007).
- 502 4. W. Jetz, P. V. A. Fine, Global Gradients in Vertebrate Diversity Predicted by Historical  
503 Area-Productivity Dynamics and Contemporary Environment. *PLOS Biol.* **10**, e1001292  
504 (2012).
- 505 5. R. Jansson, G. Rodríguez-Castañeda, L. E. Harding, What Can Multiple Phylogenies Say  
506 About the Latitudinal Diversity Gradient? A New Look at the Tropical Conservatism, Out  
507 of the Tropics, and Diversification Rate Hypotheses. *Evolution* **67**, 1741–1755 (2013).
- 508 6. J. C. Willis, *Age and Area* (Cambridge University Press, 1922).
- 509 7. A. O. Mooers, S. B. Heard, Inferring Evolutionary Process from Phylogenetic Tree Shape. *Q.*  
510 *Rev. Biol.* **72**, 31–54 (1997).
- 511 8. M. A. McPeck, J. M. Brown, Clade age and not diversification rate explains species richness  
512 among animal taxa. *Am. Nat.* **169** (2007).
- 513 9. J. J. Wiens, The causes of species richness patterns across space, time, and clades and the  
514 role of “ecological limits”. *Q. Rev. Biol.* **86**, 75–96 (2011).
- 515 10. D. L. Rabosky, G. J. Slater, M. E. Alfaro, Clade age and species richness are decoupled  
516 across the eukaryotic tree of life. *PLoS Biol.* **10**, e1001381 (2012).
- 517 11. S. B. Hedges, J. Marin, M. Suleski, M. Paymer, S. Kumar, Tree of life reveals clock-like  
518 speciation and diversification. *Mol. Biol. Evol.*, msv037 (2015).
- 519 12. R. E. Ricklefs, Global diversification rates of passerine birds. *Proc. R. Soc. Lond. B-Biol.*  
520 *Sci.* **270**, 2285–2291 (2003).
- 521 13. M. G. B. Blum, O. François, Which Random Processes Describe the Tree of Life? A Large-  
522 Scale Study of Phylogenetic Tree Imbalance. *Syst. Biol.* **55**, 685–691 (2006).
- 523 14. A. B. Phillimore, T. D. Price, Density-dependent cladogenesis in birds. *PLoS Biol.* **6**, e71  
524 (2008).
- 525 15. D. L. Rabosky, Ecological limits and diversification rate: alternative paradigms to explain  
526 the variation in species richness among clades and regions. *Ecol. Lett.* **12**, 735–743 (2009).
- 527 16. C. Venditti, A. Meade, M. Pagel, Phylogenies reveal new interpretation of speciation and the  
528 Red Queen. *Nature* **463**, 349–352 (2010).
- 529 17. T. J. Davies, A. P. Allen, L. Borda-de-Água, J. Regetz, C. J. Melián, Neutral Biodiversity  
530 Theory Can Explain the Imbalance of Phylogenetic Trees but Not the Tempo of Their  
531 Diversification. *Evolution* **65**, 1841–1850 (2011).
- 532 18. A. Purvis, S. A. Fritz, J. Rodríguez, P. H. Harvey, R. Grenyer, The shape of mammalian  
533 phylogeny: patterns, processes and scales. *Philos. Trans. R. Soc. Lond. B Biol. Sci.* **366**,  
534 2462–2477 (2011).
- 535 19. D. S. Moen, H. Morlon, Why does diversification slow down? *Trends Ecol. Evol.* **29**, 190–  
536 197 (2014).
- 537 20. L. F. H. Diaz, L. J. Harmon, M. T. C. Sugawara, E. T. Miller, M. W. Pennell,  
538 Macroevolutionary diversification rates show time dependency. *Proc. Natl. Acad. Sci.*,  
539 201818058 (2019).

- 540 21. A. Castro-Insua, C. Gómez-Rodríguez, J. J. Wiens, A. Baselga, Climatic niche divergence  
541 drives patterns of diversification and richness among mammal families. *Sci. Rep.* **8**, 8781  
542 (2018).
- 543 22. S. A. Price, S. B. Hopkins, K. K. Smith, V. L. Roth, Tempo of trophic evolution and its  
544 impact on mammalian diversification. *Proc. Natl. Acad. Sci. USA* **109**, 7008–7012 (2012).
- 545 23. A. Machac, C. H. Graham, D. Storch, Ecological controls of mammalian diversification vary  
546 with phylogenetic scale. *Glob. Ecol. Biogeogr.* **27**, 32–46 (2018).
- 547 24. J. T. Weir, D. Schluter, The Latitudinal Gradient in Recent Speciation and Extinction Rates  
548 of Birds and Mammals. *Science* **315**, 1574–1576 (2007).
- 549 25. A. D. Cutter, J. C. Gray, Ephemeral ecological speciation and the latitudinal biodiversity  
550 gradient. *Evolution* **70**, 2171–2185 (2016).
- 551 26. A. Machac, C. H. Graham, Regional Diversity and Diversification in Mammals. *Am. Nat.*  
552 **189**, E1–E13 (2017).
- 553 27. D. Jablonski, Species Selection: Theory and Data. *Annu. Rev. Ecol. Evol. Syst.* **39**, 501–524  
554 (2008).
- 555 28. J. Alroy, Small mammals have big tails in the tropics. *Glob. Ecol. Biogeogr.* **0** (2019).
- 556 29. D. M. Grossnickle, E. Newham, Therian mammals experience an ecomorphological radiation  
557 during the Late Cretaceous and selective extinction at the K–Pg boundary. *Proc R Soc B*  
558 **283**, 20160256 (2016).
- 559 30. D. J. Field, *et al.*, Early Evolution of Modern Birds Structured by Global Forest Collapse at  
560 the End-Cretaceous Mass Extinction. *Curr. Biol.* **28**, 1825–1831.e2 (2018).
- 561 31. D. M. Grossnickle, S. M. Smith, G. P. Wilson, Untangling the Multiple Ecological  
562 Radiations of Early Mammals. *Trends Ecol. Evol.* (2019)  
563 <https://doi.org/10.1016/j.tree.2019.05.008> (July 24, 2019).
- 564 32. J. S. Berv, D. J. Field, Genomic Signature of an Avian Lilliput Effect across the K-Pg  
565 Extinction. *Syst. Biol.* (2017) <https://doi.org/10.1093/sysbio/syx064> (December 7, 2017).
- 566 33. M. P. Gerkema, W. I. L. Davies, R. G. Foster, M. Menaker, R. A. Hut, The nocturnal  
567 bottleneck and the evolution of activity patterns in mammals. *Proc R Soc B* **280**, 20130508  
568 (2013).
- 569 34. C. J. Burgin, J. P. Colella, P. L. Kahn, N. S. Upham, How many species of mammals are  
570 there? *J. Mammal.* **99**, 1–14 (2018).
- 571 35. N. S. Upham, J. A. Esselstyn, W. Jetz, Inferring the mammal tree: species-level sets of  
572 phylogenies for questions in ecology, evolution, and conservation. *PLOS Biol.* (2019).
- 573 36. T. W. Davies, M. A. Bell, A. Goswami, T. J. D. Halliday, Completeness of the eutherian  
574 mammal fossil record and implications for reconstructing mammal evolution through the  
575 Cretaceous/Paleogene mass extinction. *Paleobiology* (2017)  
576 <https://doi.org/10.1017/pab.2017.20> (October 7, 2018).
- 577 37. J. Alroy, *et al.*, Taxonomic occurrences of Mammalia recorded in Fossilworks, the Evolution  
578 of Terrestrial Ecosystems database, and the Paleobiology Database. Fossilworks.  
579 <http://fossilworks.org>. (2018).
- 580 38. C. V. Bennett, P. Upchurch, F. J. Goin, A. Goswami, Deep time diversity of metatherian  
581 mammals: implications for evolutionary history and fossil-record quality. *Paleobiology* **44**,  
582 171–198 (2018).
- 583 39. R. W. Meredith, *et al.*, Impacts of the Cretaceous Terrestrial Revolution and KPg Extinction  
584 on Mammal Diversification. *Science* **334**, 521–524 (2011).



- 585 40. O. R. P. Bininda-Emonds, *et al.*, The delayed rise of present-day mammals. *Nature* **446**,  
586 507–512 (2007).
- 587 41. T. Stadler, Mammalian phylogeny reveals recent diversification rate shifts. *Proc. Natl. Acad.*  
588 *Sci.* **108**, 6187–6192 (2011).
- 589 42. J. Rolland, F. L. Condamine, F. Jiguet, H. Morlon, Faster Speciation and Reduced Extinction  
590 in the Tropics Contribute to the Mammalian Latitudinal Diversity Gradient. *PLOS Biol.* **12**,  
591 e1001775 (2014).
- 592 43. T. S. Kuhn, A. Ø. Mooers, G. H. Thomas, A simple polytomy resolver for dated phylogenies.  
593 *Methods Ecol. Evol.* **2**, 427–436 (2011).
- 594 44. S. Faurby, J.-C. Svenning, A species-level phylogeny of all extant and late Quaternary  
595 extinct mammals using a novel heuristic-hierarchical Bayesian approach. *Mol. Phylogenet.*  
596 *Evol.* **84**, 14–26 (2015).
- 597 45. J. D. Archibald, D. H. Deutschman, Quantitative Analysis of the Timing of the Origin and  
598 Diversification of Extant Placental Orders. *J. Mamm. Evol.* **8**, 107–124 (2001).
- 599 46. E. Mayr, *Animal species and evolution* (Belknap, 1963).
- 600 47. Y. Kisel, T. G. Barraclough, Speciation Has a Spatial Scale That Depends on Levels of Gene  
601 Flow. *Am. Nat.* **175**, 316–334 (2010).
- 602 48. S. Whitmee, C. D. L. Orme, Predicting dispersal distance in mammals: a trait-based  
603 approach. *J. Anim. Ecol.* **82**, 211–221 (2013).
- 604 49. Belliure, Sorci, Møller, Clobert, Dispersal distances predict subspecies richness in birds. *J.*  
605 *Evol. Biol.* **13**, 480–487 (2000).
- 606 50. S. Claramunt, E. P. Derryberry, J. V. Remsen, R. T. Brumfield, High dispersal ability  
607 inhibits speciation in a continental radiation of passerine birds. *Proc. R. Soc. Lond. B Biol.*  
608 *Sci.* **279**, 1567–1574 (2012).
- 609 51. E. B. Rosenblum, *et al.*, Goldilocks Meets Santa Rosalia: An Ephemeral Speciation Model  
610 Explains Patterns of Diversification Across Time Scales. *Evol. Biol.* **39**, 255–261 (2012).
- 611 52. D. Schluter, M. W. Pennell, Speciation gradients and the distribution of biodiversity. *Nature*  
612 **546**, 48–55 (2017).
- 613 53. Soria-Carrasco Víctor, Castresana Jose, Diversification rates and the latitudinal gradient of  
614 diversity in mammals. *Proc. R. Soc. B Biol. Sci.* **279**, 4148–4155 (2012).
- 615 54. C. A. Botero, R. Dor, C. M. McCain, R. J. Safran, Environmental harshness is positively  
616 correlated with intraspecific divergence in mammals and birds. *Mol. Ecol.* **23**, 259–268  
617 (2014).
- 618 55. R. Maor, T. Dayan, H. Ferguson-Gow, K. E. Jones, Temporal niche expansion in mammals  
619 from a nocturnal ancestor after dinosaur extinction. *Nat. Ecol. Evol.* **1**, 1889 (2017).
- 620 56. S. R. Anderson, J. J. Wiens, Out of the dark: 350 million years of conservatism and evolution  
621 in diel activity patterns in vertebrates: EVOLUTION OF DAY-NIGHT ACTIVITY  
622 PATTERNS. *Evolution* **71**, 1944–1959 (2017).
- 623 57. K. Magnuson-Ford, S. P. Otto, Linking the Investigations of Character Evolution and  
624 Species Diversification. *Am. Nat.* **180**, 225–245 (2012).
- 625 58. L. Santini, D. Rojas, G. Donati, Evolving through day and night: origin and diversification of  
626 activity pattern in modern primates. *Behav. Ecol.* **26**, 789–796 (2015).
- 627 59. J. M. Beaulieu, B. C. O’Meara, Can we build it? Yes we can, but should we use it? Assessing  
628 the quality and value of a very large phylogeny of campanulid angiosperms. *Am. J. Bot.*  
629 **105**, 417–432 (2018).

- 630 60. A. von Hardenberg, A. Gonzalez-Voyer, Disentangling Evolutionary Cause-Effect  
631 Relationships with Phylogenetic Confirmatory Path Analysis. *Evolution* **67**, 378–387  
632 (2013).
- 633 61. M. S. Springer, N. M. Foley, P. L. Brady, J. Gatesy, W. J. Murphy, Evolutionary Models for  
634 the Diversification of Placental Mammals Across the KPg Boundary. *Front. Genet.* **10**  
635 (2019).
- 636 62. M. dos Reis, *et al.*, Phylogenomic datasets provide both precision and accuracy in estimating  
637 the timescale of placental mammal phylogeny. *Proc. R. Soc. Lond. B Biol. Sci.* **279**, 3491–  
638 3500 (2012).
- 639 63. M. R. May, S. Höhna, B. R. Moore, A Bayesian approach for detecting the impact of mass-  
640 extinction events on molecular phylogenies when rates of lineage diversification may vary.  
641 *Methods Ecol. Evol.* **7**, 947–959 (2016).
- 642 64. M. M. Pires, B. D. Rankin, D. Silvestro, T. B. Quental, Diversification dynamics of  
643 mammalian clades during the K–Pg mass extinction. *Biol. Lett.* **14**, 20180458 (2018).
- 644 65. D. L. Rabosky, Automatic detection of key innovations, rate shifts, and diversity-dependence  
645 on phylogenetic trees. *PLoS ONE* **9**, e89543 (2014).
- 646 66. B. R. Moore, K. M. A. Chan, M. J. Donoghue, “Detecting Diversification Rate Variation in  
647 Supertrees” in *Phylogenetic Supertrees*, Computational Biology., O. R. P. Bininda-Emonds,  
648 Ed. (Springer Netherlands, 2004), pp. 487–533.
- 649 67. S. Nee, E. C. Holmes, R. M. May, P. H. Harvey, Extinction rates can be estimated from  
650 molecular phylogenies. *Philos. Trans. R. Soc. Lond. B-Biol. Sci.* **344**, 77–82 (1994).
- 651 68. J. J. Schenk, K. C. Rowe, S. J. Steppan, Ecological opportunity and incumbency in the  
652 diversification of repeated continental colonizations by murid rodents. *Syst. Biol.* **62**, 837–  
653 864 (2013).
- 654 69. D. L. Rabosky, H. Huang, A Robust Semi-Parametric Test for Detecting Trait-Dependent  
655 Diversification. *Syst. Biol.* **65**, 181–193 (2016).
- 656 70. H. Morlon, T. L. Parsons, J. B. Plotkin, Reconciling molecular phylogenies with the fossil  
657 record. *Proc. Natl. Acad. Sci.* **108**, 16327–16332 (2011).
- 658 71. S. Louca, M. W. Pennell, Phylogenies of extant species are consistent with an infinite array  
659 of diversification histories. *bioRxiv*, 719435 (2019).
- 660 72. J. L. Cantalapiedra, J. L. Prado, M. H. Fernández, M. T. Alberdi, Decoupled  
661 ecomorphological evolution and diversification in Neogene-Quaternary horses. *Science*  
662 **355**, 627–630 (2017).
- 663 73. G. Burin, L. R. V. Alencar, J. Chang, M. E. Alfaro, T. B. Quental, How Well Can We  
664 Estimate Diversity Dynamics for Clades in Diversity Decline? *Syst. Biol.* **68**, 47–62 (2019).
- 665 74. N. D. Pyenson, The Ecological Rise of Whales Chronicled by the Fossil Record. *Curr. Biol.*  
666 **27**, R558–R564 (2017).
- 667 75. J. J. Shi, D. L. Rabosky, Speciation dynamics during the global radiation of extant bats.  
668 *Evolution* **69**, 1528–1545 (2015).
- 669 76. L. I. Amador, R. L. M. Arévalo, F. C. Almeida, S. A. Catalano, N. P. Giannini, Bat  
670 Systematics in the Light of Unconstrained Analyses of a Comprehensive Molecular  
671 Supermatrix. *J. Mamm. Evol.* **25**, 37–70 (2018).
- 672 77. W. Jetz, G. H. Thomas, J. B. Joy, K. Hartmann, A. O. Mooers, The global diversity of birds  
673 in space and time. *Nature* **491**, 444–448 (2012).
- 674 78. P. O. Title, D. L. Rabosky, Tip rates, phylogenies and diversification: What are we  
675 estimating, and how good are the estimates? *Methods Ecol. Evol.* **10**, 821–834 (2019).

- 676 79. U. Kodandaramaiah, G. Murali, What affects power to estimate speciation rate shifts? *PeerJ*  
677 6, e5495 (2018).
- 678 80. T. D. Price, The roles of time and ecology in the continental radiation of the Old World leaf  
679 warblers (*Phylloscopus* and *Seicercus*). *Philos. Trans. R. Soc. Lond. B Biol. Sci.* **365**, 1749–  
680 1762 (2010).
- 681 81. S. Wright, The “Age and Area” Concept Extended. *Ecology* **22**, 345–347 (1941).
- 682 82. R. P. Freckleton, A. B. Phillimore, M. Pagel, Relating Traits to Diversification: A Simple  
683 Test. *Am. Nat.* **172**, 102–115 (2008).
- 684 83. D. Jablonski, Larval ecology and macroevolution in marine invertebrates. *Bull. Mar. Sci.* **39**,  
685 565–587 (1986).
- 686 84. J. B. Yoder, *et al.*, Ecological opportunity and the origin of adaptive radiations. *J. Evol. Biol.*  
687 **23**, 1581–1596 (2010).
- 688 85. A. D. Davidson, M. J. Hamilton, A. G. Boyer, J. H. Brown, G. Ceballos, Multiple ecological  
689 pathways to extinction in mammals. *Proc. Natl. Acad. Sci.* **106**, 10702–10705 (2009).
- 690 86. S. Faurby, J.-C. Svenning, Resurrection of the Island Rule: Human-Driven Extinctions Have  
691 Obscured a Basic Evolutionary Pattern. *Am. Nat.* **187**, 812–820 (2016).
- 692 87. U. M. L. Norberg, J. Rayner, Ecological morphology and flight in bats (Mammalia;  
693 Chiroptera): wing adaptations, flight performance, foraging strategy and echolocation.  
694 *Philos. Trans. R. Soc. Lond. B Biol. Sci.* **316**, 335–427 (1987).
- 695 88. D. L. Rabosky, P. O. Title, H. Huang, Minimal effects of latitude on present-day speciation  
696 rates in New World birds. *Proc R Soc B* **282**, 20142889 (2015).
- 697 89. J. D. Kennedy, *et al.*, Into and out of the tropics: the generation of the latitudinal gradient  
698 among New World passerine birds. *J. Biogeogr.* **41**, 1746–1757 (2014).
- 699 90. B. Nabholz, S. Glémin, N. Galtier, The erratic mitochondrial clock: variations of mutation  
700 rate, not population size, affect mtDNA diversity across birds and mammals. *BMC Evol.*  
701 *Biol.* **9**, 54 (2009).
- 702 91. P. R. Martin, J. J. Tewksbury, Latitudinal Variation in Subspecific Diversification of Birds.  
703 *Evolution* **62**, 2775–2788 (2008).
- 704 92. M. Mudelsee, M. E. Raymo, Slow dynamics of the Northern Hemisphere glaciation.  
705 *Paleoceanography* **20** (2005).
- 706 93. G. Hewitt, The genetic legacy of the Quaternary ice ages. *Nature* **405**, 907–913 (2000).
- 707 94. J. D. Marcot, D. L. Fox, S. R. Niebuhr, Late Cenozoic onset of the latitudinal diversity  
708 gradient of North American mammals. *Proc. Natl. Acad. Sci.* **113**, 7189–7194 (2016).
- 709 95. D. Jablonski, S. Huang, K. Roy, J. W. Valentine, Shaping the Latitudinal Diversity Gradient:  
710 New Perspectives from a Synthesis of Paleobiology and Biogeography. *Am. Nat.* **189**, 1–12  
711 (2016).
- 712 96. J. H. Arbour, S. E. Santana, A major shift in diversification rate helps explain  
713 macroevolutionary patterns in primate species diversity. *Evolution* **71**, 1600–1613 (2017).
- 714 97. K. D. Angielczyk, L. Schmitz, Nocturnality in synapsids predates the origin of mammals by  
715 over 100 million years. *Proc. R. Soc. B Biol. Sci.* **281**, 20141642 (2014).
- 716 98. G. G. Simpson, *The major features of evolution* (Columbia Univ Press, 1953).
- 717 99. M. L. Zelditch, J. Li, L. A. P. Tran, D. L. Swiderski, Relationships of diversity, disparity,  
718 and their evolutionary rates in squirrels (Sciuridae). *Evolution* **69**, 1284–1300 (2015).
- 719 100. H. Wilman, *et al.*, EltonTraits 1.0: Species-level foraging attributes of the world’s birds and  
720 mammals. *Ecology* **95**, 2027–2027 (2014).

- 721 101. K. E. Jones, *et al.*, PanTHERIA: a species-level database of life history, ecology, and  
722 geography of extant and recently extinct mammals. *Ecology* **90**, 2648–2648 (2009).
- 723 102. M. Steel, A. Mooers, The expected length of pendant and interior edges of a Yule tree.  
724 *Appl. Math. Lett.* **23**, 1315–1319 (2010).
- 725 103. I. Quintero, W. Jetz, Global elevational diversity and diversification of birds. *Nature* (2018)  
726 (February 21, 2018).
- 727 104. J. Alroy, Accurate and precise estimates of origination and extinction rates. *Paleobiology*  
728 **40**, 374–397 (2014).
- 729 105. M. Foote, Origination and extinction components of taxonomic diversity: general problems.  
730 *Paleobiology* **26**, 74–102 (2000).
- 731 106. L. J. Revell, phytools: an R package for phylogenetic comparative biology (and other  
732 things). *Methods Ecol. Evol.* **3**, 217–223 (2012).
- 733 107. D. L. Rabosky, Likelihood methods for detecting temporal shifts in diversification rates.  
734 *Evolution* **60**, 1152–1164 (2006).
- 735 108. L. S. T. Ho, C. Ané, A Linear-Time Algorithm for Gaussian and Non-Gaussian Trait  
736 Evolution Models. *Syst. Biol.* **63**, 397–408 (2014).
- 737 109. M. G. Harvey, *et al.*, Positive association between population genetic differentiation and  
738 speciation rates in New World birds. *Proc. Natl. Acad. Sci.* **114**, 6328–6333 (2017).
- 739 110. W. van der Bijl, phylopath: Easy phylogenetic path analysis in R. *PeerJ* **6**, e4718 (2018).  
740

741 **Figure legends**

742 **Fig. 1. Species-level relationships, rates, and traits for 5,911 species of mammals globally.**

743 **(a)** The maximum clade credibility topology of 10,000 node-dated trees, with numbered clade  
744 labels corresponding to orders and subclades listed in the plot periphery: Eulipoty., Eulipotyphla;  
745 Carn., Carnivora; Artio., Artiodactyla. Scale in millions of years, Ma. Branches are colored with  
746 tip-level speciation rates (tip DR metric) and marked with 24 inferred shifts in branch-specific  
747 net diversification rates (nodes A-X; shifts with multiple circles occurred on either branch, not  
748 both, over a sampling of 10 trees from the credible set). Tip-level rates are reconstructed to  
749 interior branches using Brownian motion. **(b)** Per-species ecological traits: allometric index of  
750 vagility (dispersal ability), diurnality (predominant daytime activity), and north-south latitudinal  
751 extent (see *Methods* for details). Silhouettes are from phylopic.org and open source fonts.

752 **Fig. 2. Diversification rate variation among mammal clades.** Lineage-through-time plots and  
753 estimated crown ages for **(a)** all superordinal divergences (y-axis does not apply to error bars),  
754 and **(b)** placental orders with crown age estimates overlapping the Cretaceous-Paleogene  
755 extinction event (K-Pg, dashed gray line; means and 95% CIs; filled circle if statistically  
756 different). **(c)** Rate-through-time plots for speciation, extinction, and net diversification  
757 (summarized from Fig. 1 rate shift analyses; medians from 10 trees, 95% CIs in light gray). **(d)**  
758 Fossil genus diversity through time for all Mammalia, including subsampled genus richness  
759 (quorum 0.5) and per-capita rates of genus origination and extinction. **(e)** Extant rates and  
760 lineage-specific rate shifts for the five most speciose mammal orders (same symbols as in **c**). **(f)**  
761 Rate variation within subclades of these five orders as numbered from Fig. 1; left: difference in  
762 AIC between best-fit models of diversification for trees simulated under rate-constant birth-death  
763 (gray) versus observed mammal trees (color; filled circle and \* if  $\Delta$ AIC on 100 trees is

764 statistically different); and, right: tip-level speciation rate (tip DR metric) distributions of the  
765 same simulated and observed subclades (gray versus color, one tree), comparing variation in  
766 clade tip rate mean and skew across 100 trees. The last 2 Ma are removed from parts **c-e** to focus  
767 on pre-recent rate dynamics.

768 **Fig. 3. Explanation of time-sliced clade delimitation and summarization for testing**

769 **hypotheses. (a and b)** An example subclade (rodent family Heteromyidae; 64 species) is divided  
770 into time-sliced clades in the same way as the Fig. 4 and 5 analyses of all Mammalia. Branch  
771 colors in the subclade phylogeny correspond to tip-level speciation rates (tip DR metric)  
772 calculated on the full tree, and red symbols are sized according to estimates of species vagility.  
773 An example time slice for 5-Ma tipward clades is shown with summaries of tip rate mean and  
774 vagility (harmonic and geometric means, respectively), which are then compared to clade crown  
775 age and species richness. **(c)** Example of how time-sliced clades are analyzed across Mammalia,  
776 here showing 35-Ma clades used to test for relationships among log clade richness and three  
777 predictors in a multivariate PGLS analysis (phylogenetic generalized least squares). This PGLS  
778 analysis was then repeated across a sample of 100 or 1000 trees from the credible set, and across  
779 time-sliced clade delimitations every 5 Ma from 5-70 Ma, in each case comparing observed  
780 mammal clades to clades from simulated rate-constant trees of the same crown age and species  
781 richness (colors indicate different extinction fractions used). **(d)** Results for observed mammal  
782 clades (grey) defined at time-slices every 5 Ma for log clade richness and its variance, as  
783 compared to simulated trees (colors).

784 **Fig. 4. Age and rate components of species richness variation across time-sliced clades.** The  
785 log species richness of time-sliced clades every 5 Ma, with clades defined tipward by dotted lines  
786 as illustrated in Fig. 3, across a sample of 100 phylogenies is best predicted jointly by **(a)** clade

787 crown age, **(b)** clade tip-level speciation rate mean (harmonic mean of species' tip DR in clade),  
788 and **(c)** clade tip-level speciation rate skew (asymmetry of species' tip DR in clade; multivariate  
789 PGLS [phylogenetic generalized least squares] on standardized data with 95% confidence  
790 intervals [CIs] on parameter estimates). Clade tip rate mean explains most of the variation in  
791 species richness across time-sliced clades, given its consistently larger unique effects in observed  
792 clades (grey symbols and black line) than either clade crown age or tip rate skew. By comparing  
793 these observed effects on clade richness to simulated rate-constant effects (colored symbols and  
794 dashed lines; different extinction fractions,  $\epsilon$ ), we find that tip rate mean has significantly  
795 stronger effects on richness than expected from simulated birth-death trees containing only  
796 stochastic rate variation. Clade tip rate skew also explains significantly more variation in clade  
797 richness than expected at deeper time slices, while crown age matches the simulated predictions.  
798 Other predictors were also assessed, as were taxon-delimited clades (Fig. S10). Solid black lines  
799 connect the observed best-fitting models across time slices and trees.

800 **Fig. 5. Connecting clade ages, rates, richness, and traits in the mammal tree of life.** **(a,** top  
801 panel) Distribution of tip-level speciation rates (tip DR metric, harmonic mean of 10,000 trees)  
802 relative to per-species estimates of vagility (allometric index of maximum natal dispersal  
803 distance), diurnality (0=nocturnal or cathemeral, 1=diurnal), and absolute value of latitude  
804 (centroid of expert maps) across 5,675 species, excluding extinct and marine species. Loess  
805 smoothing lines visualize general trends without considering phylogeny (blue, span=0.33). **(a,**  
806 bottom panel) Species-level effects considering phylogeny between tip speciation rates and  
807 ecological traits, as subset across trophic levels of herbivores, omnivores, and carnivores ( $N =$   
808 1637, 1852, and 1565, respectively; univariate PGLS [phylogenetic generalized least squares]  
809 conducted on standardized predictors across 1000 trees, showing 95% confidence intervals of

810 slopes; colored if effects are significant, red for negative, blue for positive, else gray). **(b)**  
811 Phylogenetic path analysis conducted across time-sliced clades at 10-, 30-, and 50-Ma intervals,  
812 delimited as illustrated in Fig. 3 (nested multivariate PGLS on standardized data). This causal  
813 framework connects clade-level summaries of species' vagility (geometric mean), diurnality  
814 (arithmetic mean), and latitude (arithmetic mean of centroid absolute values) to corresponding  
815 clade rates, and those rates to clade species richness. Path thickness, color, and directionality  
816 denote median coefficients of model-averaged analyses across 1000 trees (see legend: positive  
817 paths in shades of blue, negative in shades of red; time-sliced clades of 10-, 30-, and 50-Ma  
818 proceed from left to right as labeled). The bottom panels provide per-estimate uncertainty across  
819 time slices (slope  $\pm$  SE), with non-zero estimates totaled in the right margin. Paths present in  
820 >500 trees are bolded and displayed in the upper path model diagram whereas other paths are  
821 dashed lines.



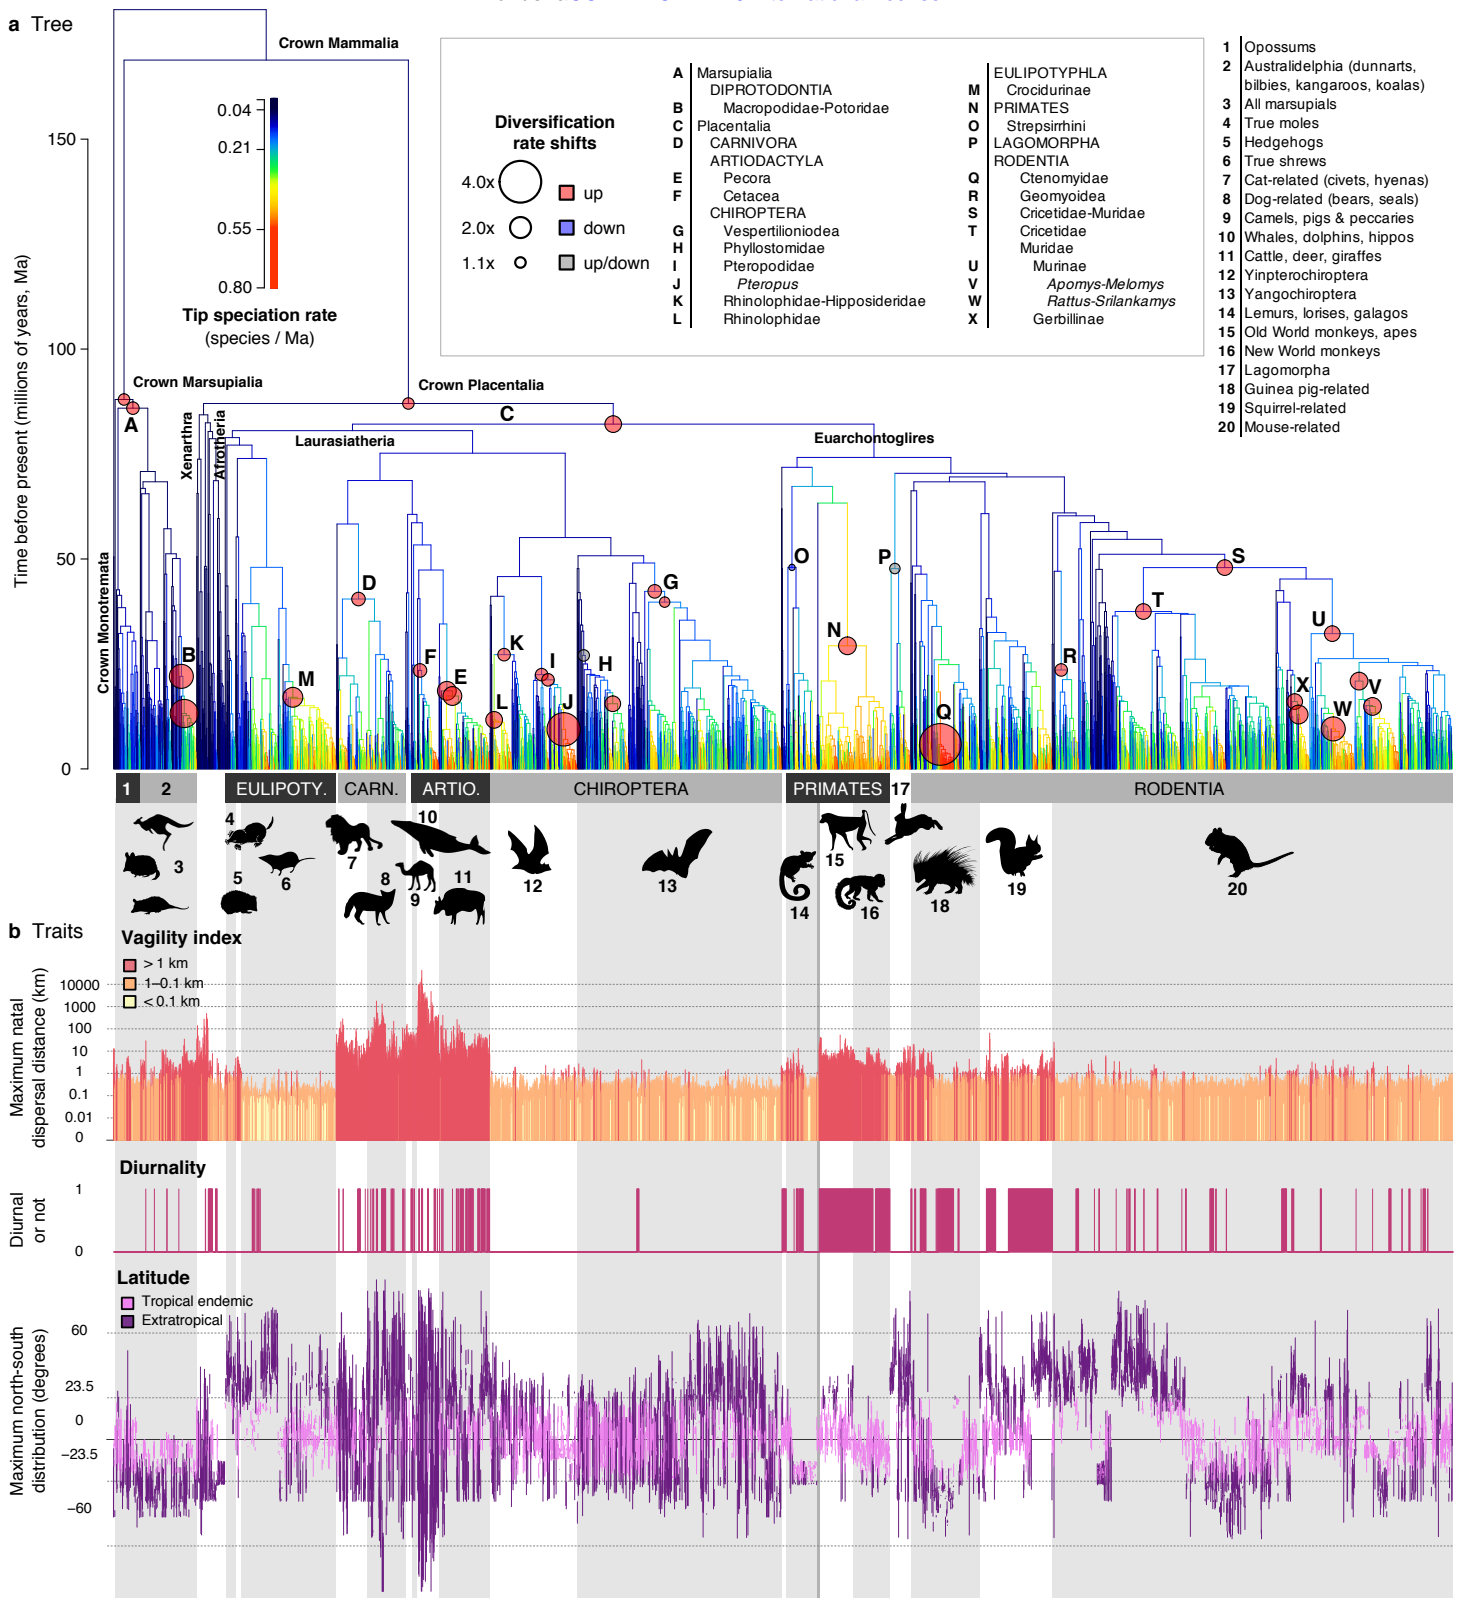

**Fig. 1. Species-level relationships, rates, and traits for 5,911 species of mammals globally.** (a) The maximum clade credibility topology of 10,000 node-dated trees, with numbered clade labels corresponding to orders and subclades listed in the plot periphery: Eulipot., Eulipotyphla; Carn., Carnivora; Artio., Artiodactyla. Scale in millions of years, Ma. Branches are colored with tip-level speciation rates (tip DR metric) and marked with 24 inferred shifts in branch-specific net diversification rates (nodes A-X; shifts with multiple circles occurred on either branch, not both, over a sampling of 10 trees from the credible set). Tip-level rates are reconstructed to interior branches using Brownian motion. (b) Per-species ecological traits: allometric index of vagility (dispersal ability), diurnality (predominant daytime activity), and north-south latitudinal extent (see *Methods* for details). Silhouettes are from phylopic.org and open source fonts.

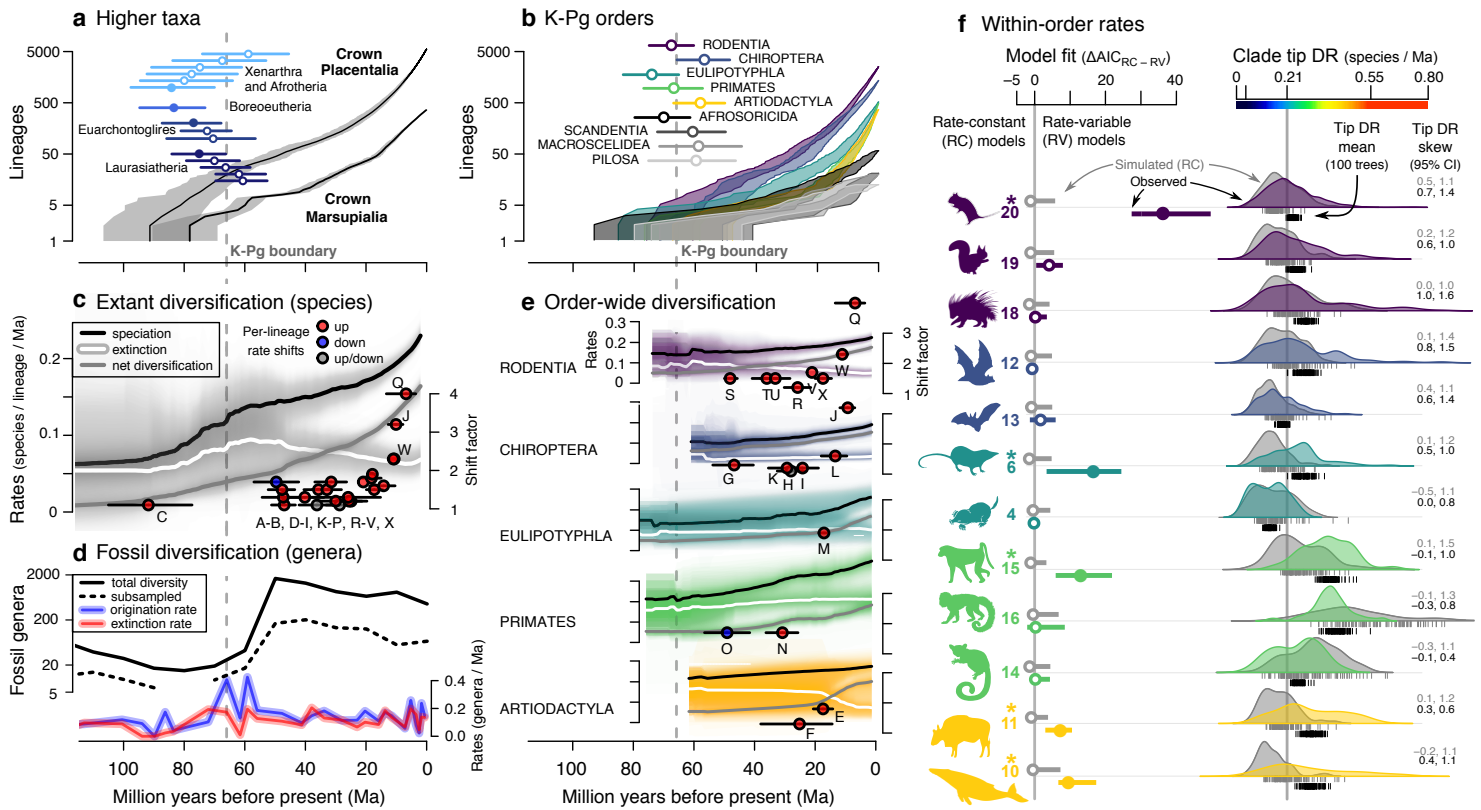

**Fig. 2. Diversification rate variation among mammal clades.** Lineage-through-time plots and estimated crown ages for (a) all superordinal divergences (y-axis does not apply to error bars), and (b) placental orders with crown age estimates overlapping the Cretaceous-Paleogene extinction event (K-Pg, dashed grey line; means and 95% CIs; filled circle if statistically different). (c) Extant rates of speciation, extinction, and net diversification through time on the full Mammalia phylogeny relative to lineage-specific shifts in net diversification (median rates from 10 trees, 95% CIs in light grey). (d) Fossil genus diversity through time for all Mammalia, including subsampled genus richness (quorum 0.5) and per-capita rates of genus origination and extinction. (e) Extant rates and lineage-specific rate shifts for the five most speciose mammal orders (same symbols as in c). (f) Rate variation within subclades of these five orders (numbers correspond to Fig. 1); left: quantified as difference in AIC between best-fit models of diversification ( $\Delta\text{AIC}_{\text{RC-RV}}$  median and 95% CIs on 100 trees) for trees simulated under rate-constant birth-death (RC, grey) versus observed mammal trees (colour; \* and filled circle if statistically different); and, right: example tip DR distributions of the same simulated and observed subclades (grey versus colour, one tree), comparing variation in tip DR mean and skew relative to the median for all Mammalia (grey line, 100 trees). The last 2 Ma are removed from parts c-e to focus on pre-recent rate dynamics.

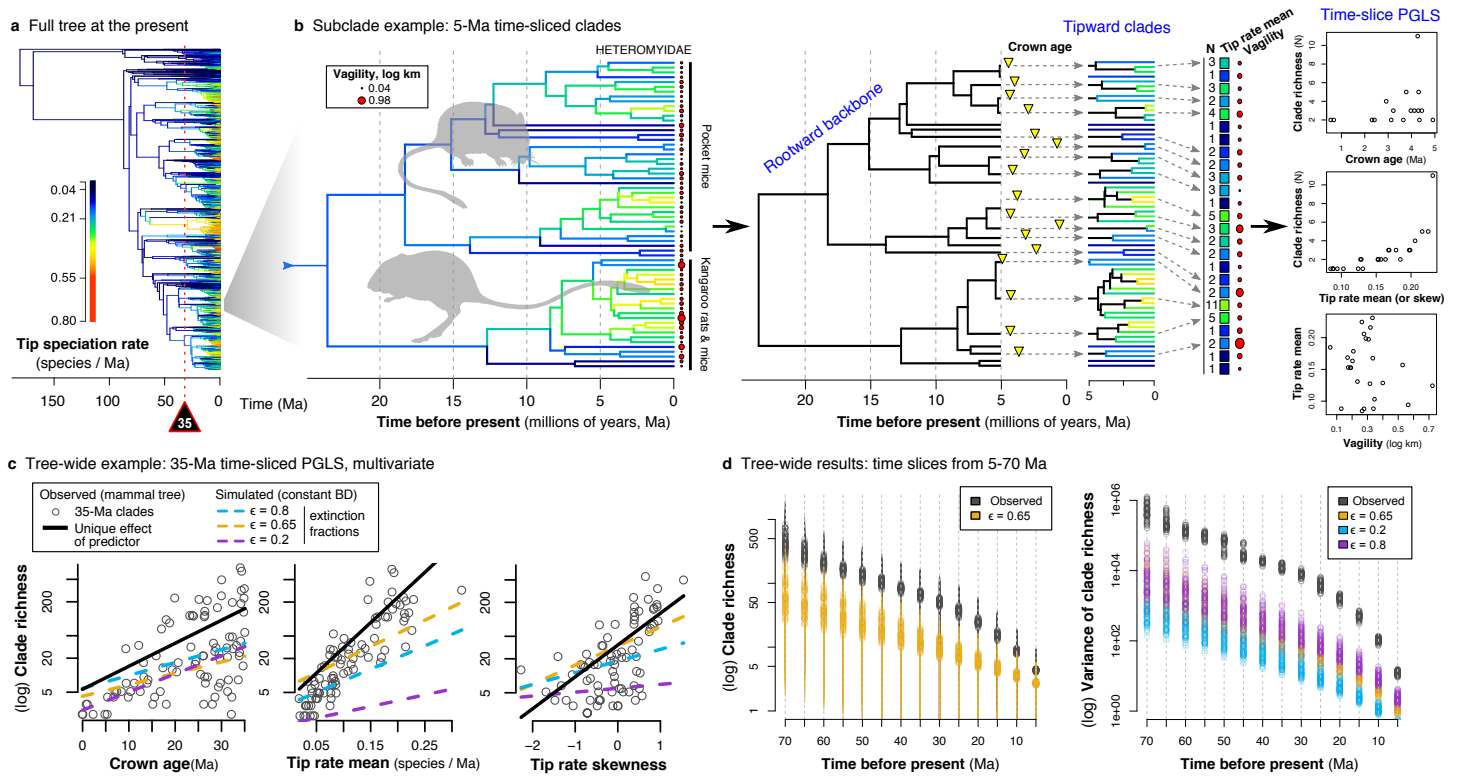

**Fig. 3. Explanation of time-sliced clade delimitation and summarization for testing hypotheses. (a and b)** An example subclade (rodent family Heteromyidae; 64 species) is divided into time-sliced clades in the same way as the Fig. 4 and 5 analyses of all Mammalia. Branch colors in the subclade phylogeny correspond to tip-level speciation rates (tip DR metric) calculated on the full tree, and red symbols are sized according to estimates of species vagility. An example time slice for 5-Ma tipward clades is shown with summaries of tip rate mean and vagility (harmonic and geometric means, respectively), which are then compared to clade crown age and species richness. **(c)** Example of how time-sliced clades are analyzed across Mammalia, here showing 35-Ma clades used to test for relationships among log clade richness and three predictors in a multivariate PGLS analysis (phylogenetic generalized least squares). This PGLS analysis was then repeated across a sample of 100 or 1000 trees from the credible set, and across time-sliced clade delimitations every 5 Ma from 5-70 Ma, in each case comparing observed mammal clades to clades from simulated rate-constant trees of the same crown age and species richness (colors indicate different extinction fractions used). **(d)** Results for observed mammal clades (grey) defined at time-slices every 5 Ma for log clade richness and its variance, as compared to simulated trees (colors).

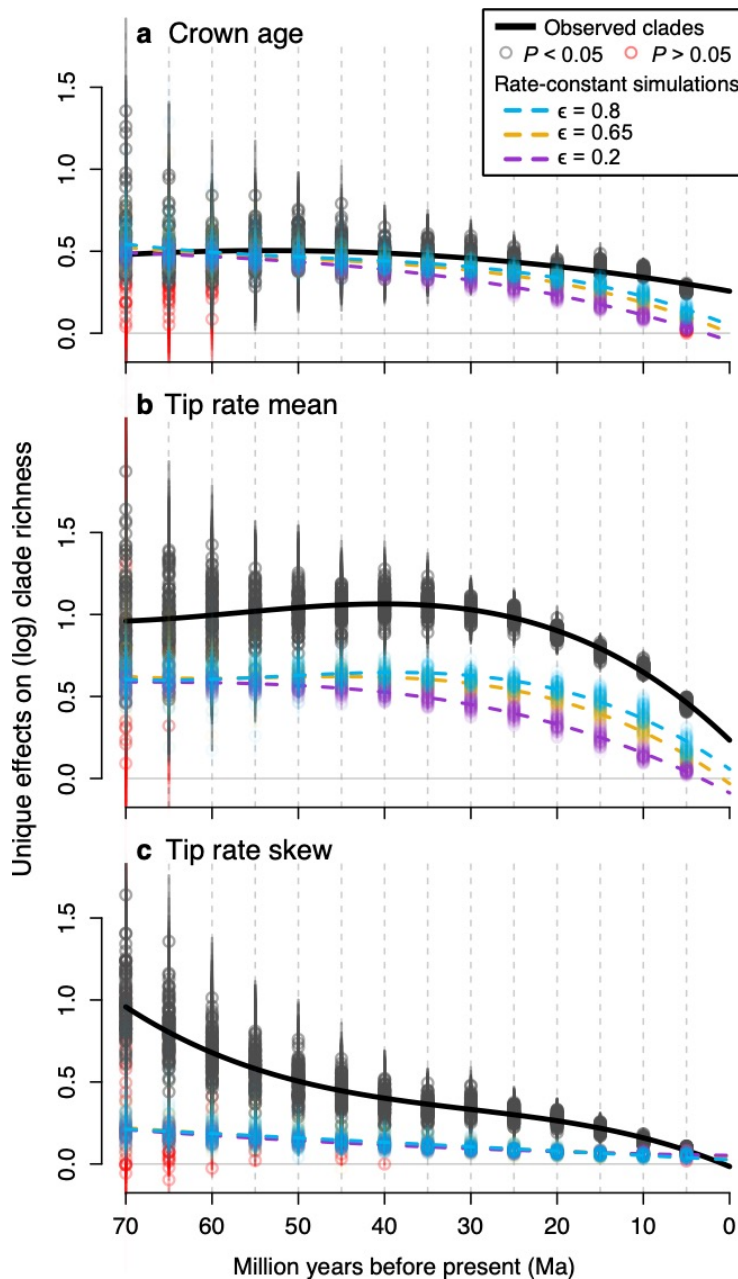

**Fig. 4. Age and rate components of species richness variation across time-sliced clades.** The log species richness of time-sliced clades every 5 Ma, with clades defined tipward by dotted lines as illustrated in Fig. 3, across a sample of 100 phylogenies is best predicted jointly by (a) clade crown age, (b) clade tip-level speciation rate mean (harmonic mean of species' tip DR in clade), and (c) clade tip-level speciation rate skew (asymmetry of species' tip DR in clade; multivariate PGLS [phylogenetic generalized least squares] on standardized data with 95% confidence intervals [CIs] on parameter estimates). Clade tip rate mean explains most of the variation in species richness across time-sliced clades, given its consistently larger unique effects in observed clades (grey symbols and black line) than either clade crown age or tip rate skew. By comparing these observed effects on clade richness to simulated rate-constant effects (colored symbols and dashed lines; different extinction fractions,  $\epsilon$ ), we find that tip rate mean has significantly stronger effects on richness than expected from simulated birth-death trees containing only stochastic rate variation. Clade tip rate skew also explains significantly more variation in clade richness than expected at deeper time slices, while crown age matches the simulated predictions. Other predictors were also assessed, as were taxon-delimited clades (Fig. S10). Solid black lines connect the observed best-fitting models across time slices and trees.

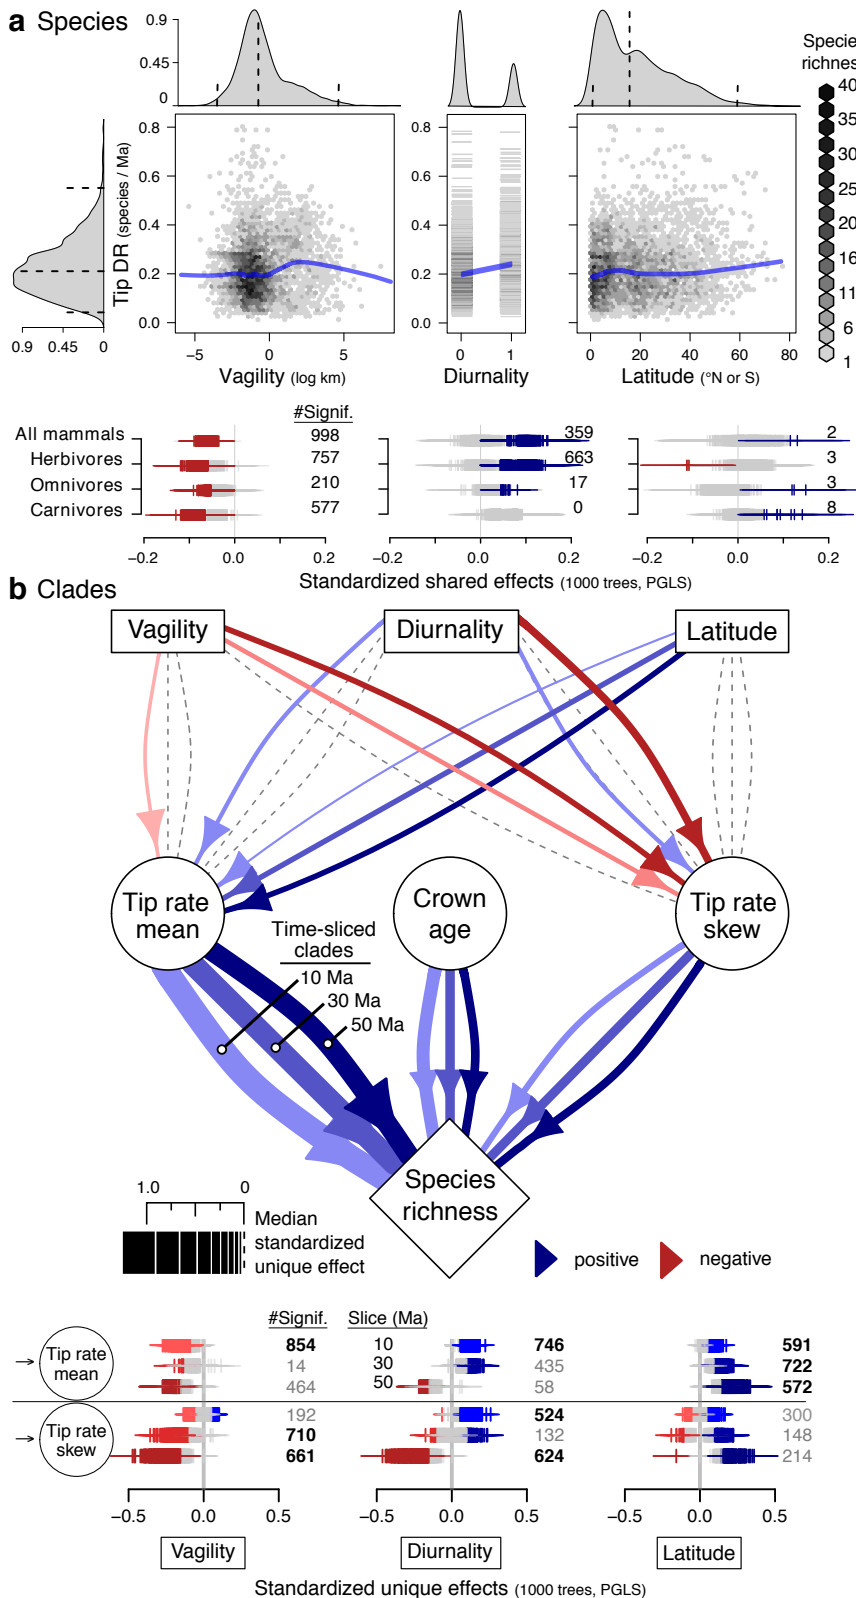

**Fig. 5. Connecting clade ages, rates, richness, and traits in the mammal tree of life.** (a, top panel) Distribution of tip-level speciation rates (tip DR metric, harmonic mean of 10,000 trees) relative to per-species estimates of vagility (allometric index of maximum natal dispersal distance), diurnality (0=nocturnal or cathemeral, 1=diurnal), and absolute value of latitude (centroid of expert maps) across 5,675 species, excluding extinct and marine species. Loess smoothing lines visualize general trends without considering phylogeny (blue, span=0.33). (a, bottom panel) Species-level effects considering phylogeny between tip speciation rates and ecological traits, as subset across trophic levels of herbivores, omnivores, and carnivores ( $N = 1637, 1852, \text{ and } 1565$ , respectively; univariate PGLS [phylogenetic generalized least squares] conducted on standardized predictors across 1000 trees, showing 95% confidence intervals of slopes; colored if effects are significant, red for negative, blue for positive, else gray). (b) Phylogenetic path analysis conducted across time-sliced clades at 10-, 30-, and 50-Ma intervals, delimited as illustrated in Fig. 3 (nested multivariate PGLS on standardized data). This causal framework connects clade-level summaries of species' vagility (geometric mean), diurnality (arithmetic mean), and latitude (arithmetic mean of centroid absolute values) to corresponding clade rates, and those rates to clade species richness. Path thickness, color, and directionality denote median coefficients of model-averaged analyses across 1000 trees (see legend: positive paths in shades of blue, negative in shades of red; time-sliced clades of 10-, 30-, and 50-Ma proceed from left to right as labeled). The bottom panels provide per-estimate uncertainty across time slices (slope  $\pm$  SE), with non-zero estimates totaled in the right margin. Paths present in  $>500$  trees are bolded and displayed in the upper path model diagram whereas other paths are dashed lines.
